# Supplementary material for: Coexistence of structurally similar but electronically distinct isomers of delocalized cation radicals as a basis for the development of functional materials
Source: Royal Society of Chemistry journal article supplement (doi:10.1039/c9cp02271f), 2019-01-01
Supplement: c9cp02271f1.pdf [file c9cp02271f1.pdf]

# Electronic Supporting Information (ESI)

---

## Coexistence of Structurally Similar but Electronically Distinct Isomers of Delocalized Cation Radicals as a Basis for the Development of Functional Materials

*Marat R. Talipov\* and Esther Steiner*

Department of Chemistry and Biochemistry,  
New Mexico State University,  
Las Cruces, New Mexico 88003, United States

### **Corresponding Author**

\*E-mail: [talipovm@nmsu.edu](mailto:talipovm@nmsu.edu)

### **Contents**

|                                                                     |    |
|---------------------------------------------------------------------|----|
| Computational Details                                               | 2  |
| Structural Formula of Molecules Involved in Screening               | 3  |
| Relative Energies of the Cation Radicals of Molecules from Scheme 1 | 4  |
| Cation Radical Geometries                                           | 6  |
| Cation Radical Electronic Structures                                | 7  |
| Cation Radical Spectral Properties                                  | 14 |
| Modeling of the single-molecule conductance through phenanthrene    | 15 |
| Cartesian Coordinates of the Optimized Structures                   | 21 |
| 1 (Scheme 1)                                                        | 21 |
| 2 (Scheme 1)                                                        | 23 |
| 3 (Scheme 1)                                                        | 27 |
| 4 (Scheme 1)                                                        | 32 |
| 5 (Scheme 1)                                                        | 35 |
| 6 (Scheme 1)                                                        | 38 |
| 7 (Scheme 1)                                                        | 41 |

## Computational Details

The following protocol was used for the DMRG calculations:

| Parameter | Step 1 | Step 2 | Step 3 | Step 4 | Step 5 | Step 6 | Step 7 | Step 8 | Step 9 |
|-----------|--------|--------|--------|--------|--------|--------|--------|--------|--------|
| Sweeps    | 0      | 4      | 8      | 12     | 14     | 16     | 18     | 20     | 22     |
| MaxMs     | 200    | 400    | 800    | 1000   | 1000   | 1000   | 1000   | 1000   | 1000   |
| Tolerance | 1e-5   | 1e-5   | 1e-5   | 1e-5   | 1e-6   | 1e-7   | 1e-8   | 1e-9   | 1e-9   |
| Noise     | 1e-5   | 1e-5   | 1e-5   | 5e-5   | 5e-5   | 5e-5   | 5e-5   | 5e-5   | 0      |

# Structural Formula of Molecules Involved in Screening

Chart S1.

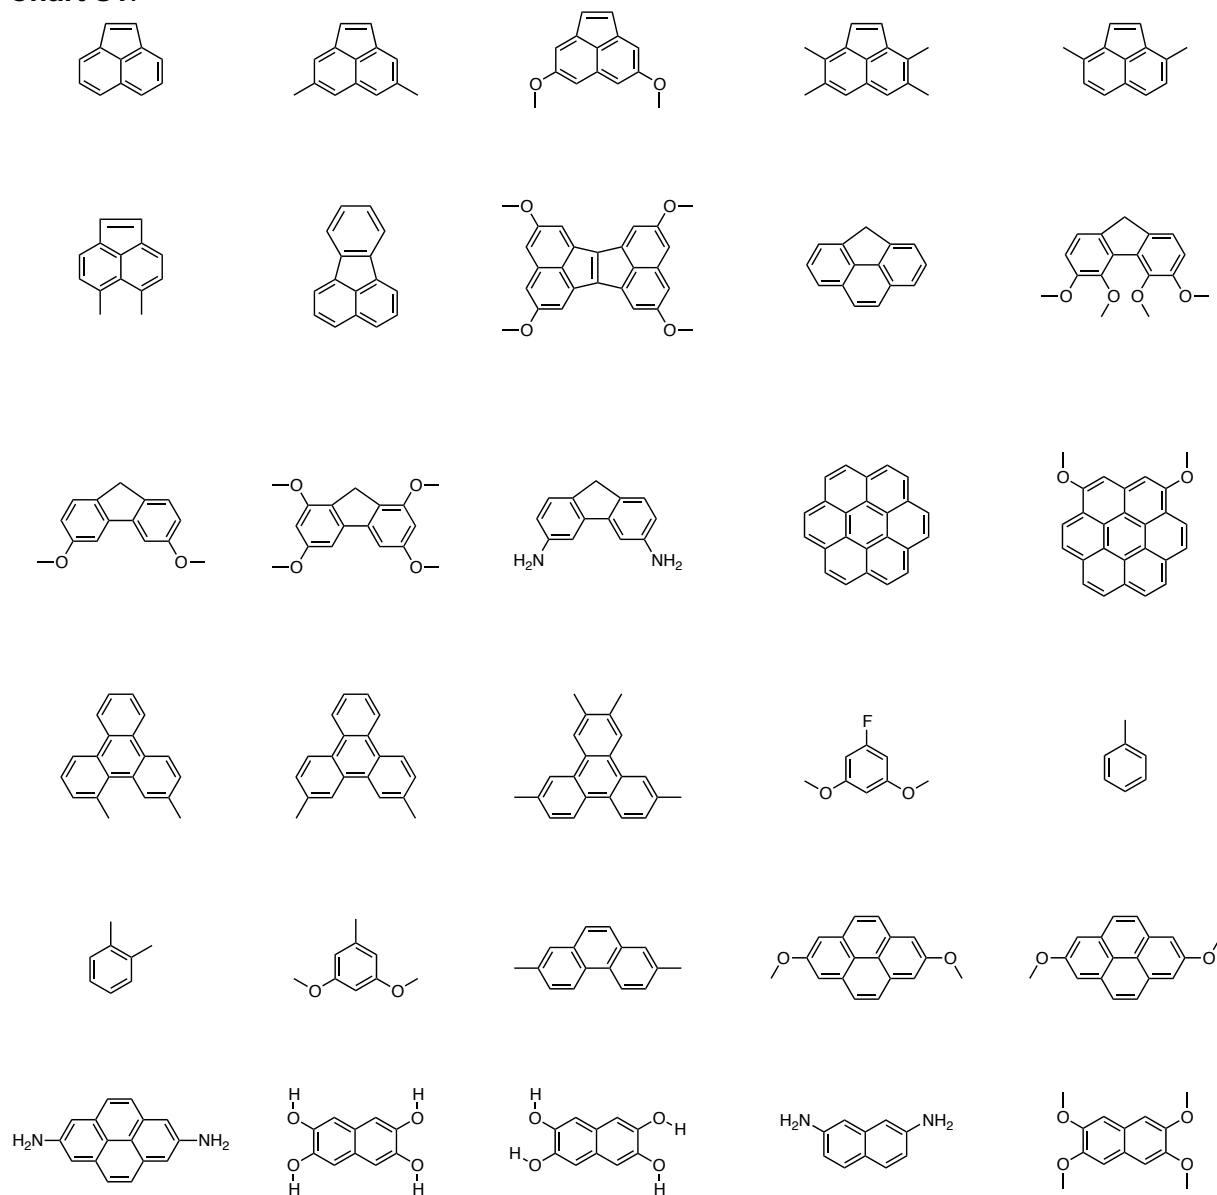

## Relative Energies of the Cation Radicals of Molecules from Scheme 1

**Table S1.** Relative energies of the isomeric forms of **1<sup>+</sup>**, computed using DFT and ab initio methods.

| Electronic State                            | Q(A <sub>2</sub> ) | Q(N) | Q(B <sub>2</sub> ) |
|---------------------------------------------|--------------------|------|--------------------|
| B1LYP40/6-31G(d)                            |                    |      |                    |
| Ψ(A <sub>2</sub> )                          | 3.0                | 30.3 | 47.7               |
| Ψ(B <sub>2</sub> )                          | 45.6               | 28.3 | 0.0                |
| UCCSD(T)/aug-cc-pVDZ                        |                    |      |                    |
| Ψ(A <sub>2</sub> )                          | 0.0                | 22.7 | 42.1               |
| Ψ(B <sub>2</sub> )                          | 44.1               | 24.6 | 2.0                |
| CASPT2(all- <i>p<sub>z</sub></i> )/6-31G(d) |                    |      |                    |
| Ψ(A <sub>2</sub> )                          | 0.0                | 23.3 | 41.8               |
| Ψ(B <sub>2</sub> )                          | 43.9               | 29.4 | 3.7                |
| B1LYP40/6-31G(d)+PCM(DCM)                   |                    |      |                    |
| Ψ(A <sub>2</sub> )                          | 0.0                | -    | -                  |
| Ψ(B <sub>2</sub> )                          | -                  | -    | 1.4                |

**Table S2.** Relative energies of the isomeric forms of **2<sup>+</sup>**, computed using DFT and ab initio methods.

| Electronic State                            | Q(A <sub>2</sub> ) | Q(N) | Q(B <sub>2</sub> ) |
|---------------------------------------------|--------------------|------|--------------------|
| B1LYP40/6-31G(d)                            |                    |      |                    |
| Ψ(A <sub>2</sub> )                          | 6.0                | 20.6 | 46.3               |
| Ψ(B <sub>2</sub> )                          | 39.5               | 13.7 | 0.0                |
| CASPT2(all- <i>p<sub>z</sub></i> )/6-31G(d) |                    |      |                    |
| Ψ(A <sub>2</sub> )                          | 4.0                | 15.2 | 32.6               |
| Ψ(B <sub>2</sub> )                          | 43.3               | 16.6 | 0.0                |
| B1LYP40/6-31G(d)+PCM(DCM)                   |                    |      |                    |
| Ψ(A <sub>2</sub> )                          | 8.8                | -    | -                  |
| Ψ(B <sub>2</sub> )                          | -                  | -    | 0.0                |

**Table S3.** Relative energies of the isomeric forms of **3<sup>+</sup>**, computed using DFT and ab initio methods.

| Electronic State                            | Q(A <sub>2</sub> ) | Q(N) | Q(B <sub>2</sub> ) |
|---------------------------------------------|--------------------|------|--------------------|
| B1LYP40/6-31G(d)                            |                    |      |                    |
| Ψ(A <sub>2</sub> )                          | 4.8                | 25.2 | 38.0               |
| Ψ(B <sub>2</sub> )                          | 33.5               | 12.1 | 0.0                |
| CASPT2(all- <i>p<sub>z</sub></i> )/6-31G(d) |                    |      |                    |
| Ψ(A <sub>2</sub> )                          | 23.9               | 39.9 | 48.6               |
| Ψ(B <sub>2</sub> )                          | 30.4               | 11.4 | 0.0                |
| B1LYP40/6-31G(d)+PCM(DCM)                   |                    |      |                    |
| Ψ(A <sub>2</sub> )                          | 9.0 ‡              | -    | -                  |
| Ψ(B <sub>2</sub> )                          | -                  | -    | 0.0                |

**Table S4.** Relative energies of the isomeric forms of **4\*\***, computed w DFT and ab initio methods.

| Electronic State                     | Q(A <sub>2</sub> ) | Q(N) | Q(B <sub>2</sub> ) |
|--------------------------------------|--------------------|------|--------------------|
| B1LYP40/6-31G(d)                     |                    |      |                    |
| Ψ(A <sub>2</sub> )                   | 33.0               | 45.4 | 71.6               |
| Ψ(B <sub>2</sub> )                   | 37.8               | 24.5 | 0.0                |
| CASPT2(all-ρ <sub>2</sub> )/6-31G(d) |                    |      |                    |
| Ψ(A <sub>2</sub> )                   | 30.7               | 42.4 | 63.1               |
| Ψ(B <sub>2</sub> )                   | 36.9               | 25.3 | 0.0                |
| B1LYP40/6-31G(d)+PCM(DCM)            |                    |      |                    |
| Ψ(A <sub>2</sub> )                   | 30.1               | -    | -                  |
| Ψ(B <sub>2</sub> )                   | -                  | -    | 0.0                |

**Table S5.** Relative energies of the isomeric forms of **5\*\***, computed using DFT and ab initio methods.

| Electronic State                     | Q(A <sub>2</sub> ) | Q(N) | Q(B <sub>2</sub> ) |
|--------------------------------------|--------------------|------|--------------------|
| B1LYP40/6-31G(d)                     |                    |      |                    |
| Ψ(A <sub>2</sub> )                   | 6.0                | 20.6 | 46.3               |
| Ψ(B <sub>2</sub> )                   | 39.5               | 13.7 | 0.0                |
| CASPT2(all-ρ <sub>2</sub> )/6-31G(d) |                    |      |                    |
| Ψ(A <sub>2</sub> )                   | 4.0                | 15.2 | 32.6               |
| Ψ(B <sub>2</sub> )                   | 43.3               | 16.6 | 0.0                |
| B1LYP40/6-31G(d)+PCM(DCM)            |                    |      |                    |
| Ψ(A <sub>2</sub> )                   | 14.8 <sup>‡</sup>  | -    | -                  |
| Ψ(B <sub>2</sub> )                   | -                  | -    | 0.0                |

**Table S6.** Relative energies of the isomeric forms of **6\*\***, computed using DFT and ab initio methods.

| Electronic State                     | Q(B <sub>2u</sub> ) | Q(N) | Q(A <sub>u</sub> ) |
|--------------------------------------|---------------------|------|--------------------|
| B1LYP40/6-31G(d)                     |                     |      |                    |
| Ψ(B <sub>2u</sub> )                  | 0.0                 | 23.6 | 20.4               |
| Ψ(A <sub>u</sub> )                   | 47.8                | 42.0 | 27.0               |
| CASPT2(all-ρ <sub>2</sub> )/6-31G(d) |                     |      |                    |
| Ψ(B <sub>2u</sub> )                  | 0.0                 | 18.2 | 14.0               |
| Ψ(A <sub>u</sub> )                   | 39.3                | 32.4 | 21.0               |

**Table S7.** Relative energies of the isomeric forms of **7\*\***, computed using DFT and ab initio methods.

| Electronic State                     | Q(A <sub>2</sub> ) | Q(B <sub>2</sub> ) |
|--------------------------------------|--------------------|--------------------|
| B1LYP40/6-31G(d)                     |                    |                    |
| Ψ(A <sub>2</sub> )                   | 0.0                | 21.2               |
| Ψ(B <sub>2</sub> )                   | 39.1               | 18.3               |
| CASPT2(all-ρ <sub>2</sub> )/6-31G(d) |                    |                    |
| Ψ(A <sub>2</sub> )                   | 0.0                | 21.3               |
| Ψ(B <sub>2</sub> )                   | 44.4               | 27.4               |

## Cation Radical Geometries

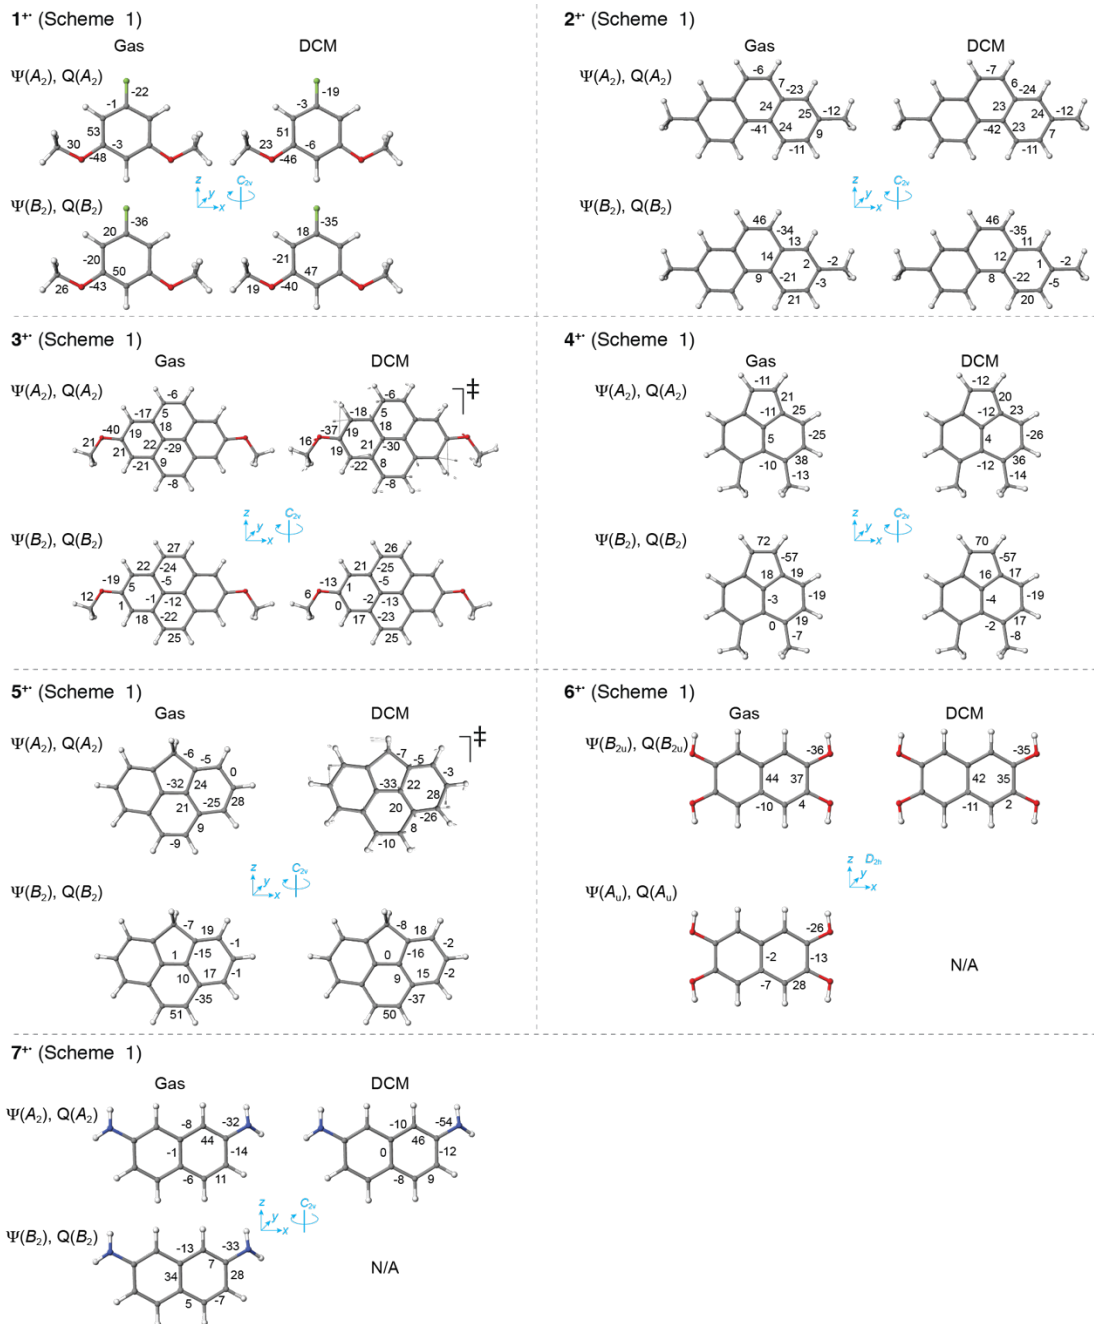

**Figure S1.** Equilibrium geometries [B1LYP40/6-31G(d)] of the electronic isomers of  $(1-7)^{+\bullet}$  without and with the implicit solvation model, as denoted. The values near the bonds in indicate the bond length displacement due to the oxidation (in milli-Å). The wavefunction symmetry is denoted as  $\Psi(\text{sym})$  while the geometry used for the single-point calculation is denoted as  $Q(\text{sym})$ . For example,  $\Psi(A_2), Q(B_2)$  denotes that the geometry optimization for the cation radical state with symmetry  $B_2$  was followed by a single-point calculation for a cation radical state with symmetry  $A_2$ . Double-dagger symbols in  $3^{+\bullet}$  and  $5^{+\bullet}$  indicate the presence of imaginary frequency in the vibrational Hessian, and the corresponding displacement vectors are shown using arrows.

# Cation Radical Electronic Structures

Shape of the Natural Orbitals with occ = 1

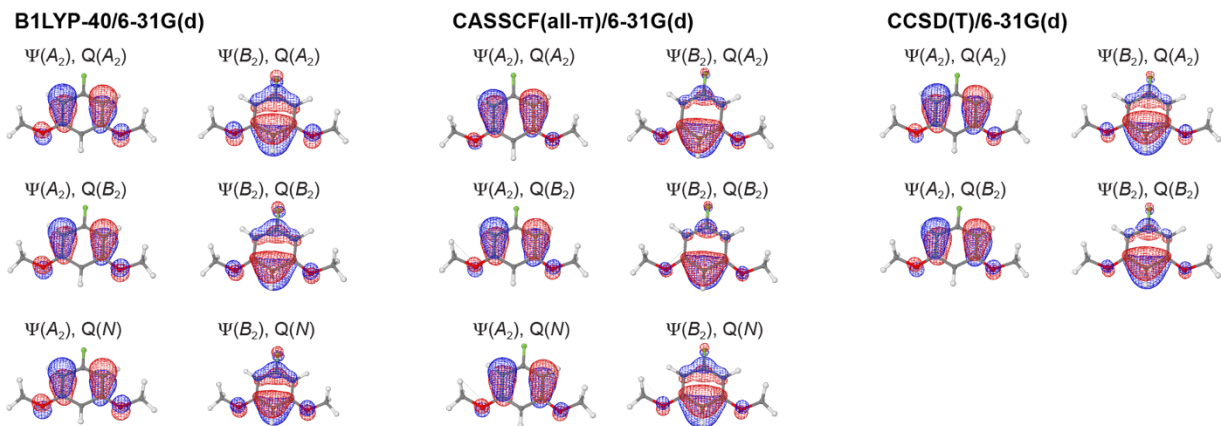

Spin densities in CRs

B1LYP-40/6-31G(d)+PCM(DCM)

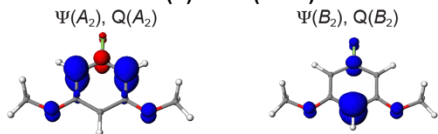

B1LYP-40/6-31G(d)+PCM(DCM)

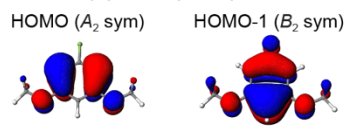

$E = -6.902$  eV       $E = -6.932$  eV  
 $\Delta E = 0.030$  eV

**Figure S2.** Spin density distribution in  $1^{+\bullet}$  represented as the singly-occupied natural orbital isovalue (0.03 a.u.) plots, isovalue (0.03 a.u.) plots of the HOMO and HOMO-1 of  $1$ , and spin density ( $\rho_\alpha - \rho_\beta$ ) plots (0.001 a.u.) for the electronic isomers of  $1^{+\bullet}$ , as denoted.

Shape of the Natural Orbitals with occ = 1

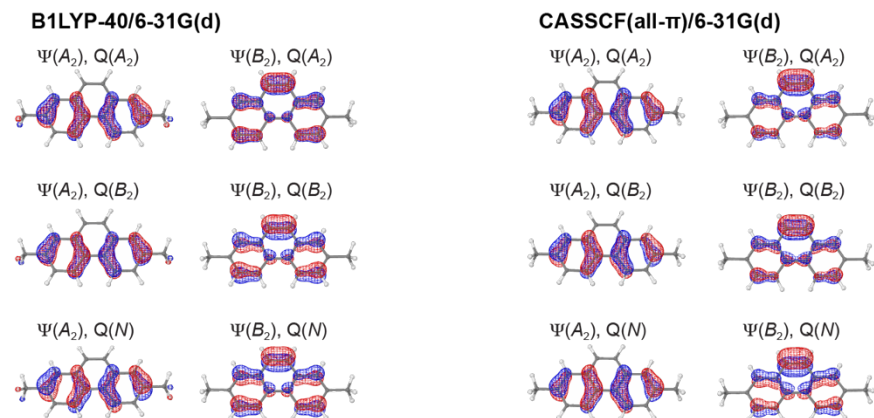

Spin densities in CRs

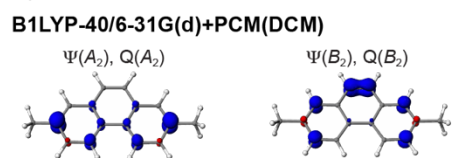

Canonical orbital shapes in neutral molecules

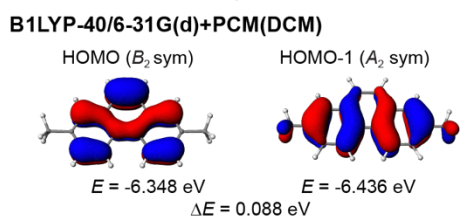

**Figure S3.** Spin density distribution in  $2^{**}$  represented as the singly-occupied natural orbital isovalue (0.03 a.u.) plots, isovalue (0.03 a.u.) plots of the HOMO and HOMO-1 of  $2$ , and spin density ( $\rho_\alpha - \rho_\beta$ ) plots (0.001 a.u.) for the electronic isomers of  $2^{**}$ , as denoted.



Shape of the Natural Orbitals with occ = 1

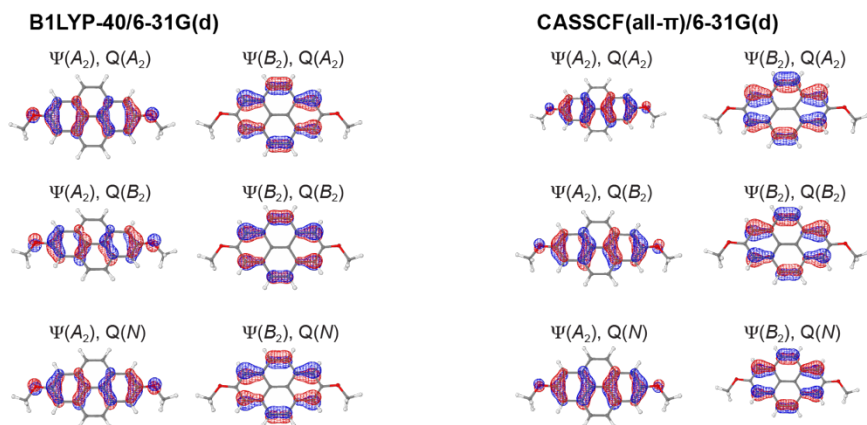

Spin densities in CRs

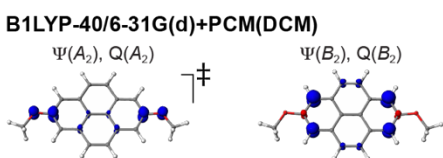

Canonical orbital shapes in neutral molecules

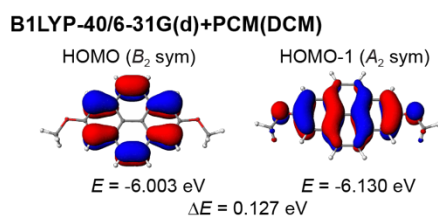

**Figure S4.** Spin density distribution in  $3^{**}$  represented as the singly-occupied natural orbital isovalue (0.03 a.u.) plots, isovalue (0.03 a.u.) plots of the HOMO and HOMO-1 of  $3$ , and spin density ( $\rho_\alpha - \rho_\beta$ ) plots (0.001 a.u.) for the electronic isomers of  $3^{**}$ , as denoted.

Shape of the Natural Orbitals with occ = 1

**B1LYP-40/6-31G(d)**

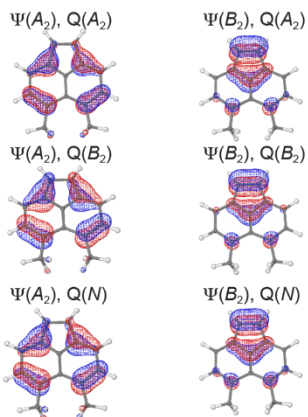

**CASSCF(all- $\pi$ )/6-31G(d)**

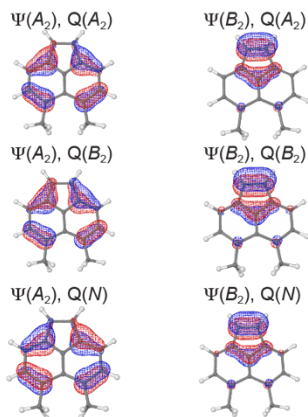

Spin densities in CRs

**B1LYP-40/6-31G(d)+PCM(DCM)**

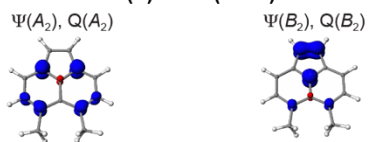

Canonical orbital shapes in neutral molecules

**B1LYP-40/6-31G(d)+PCM(DCM)**

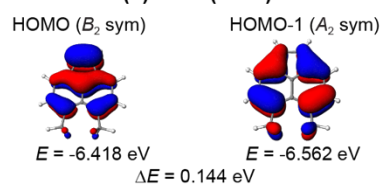

**Figure S5.** Spin density distribution in  $4^{+}$  represented as the singly-occupied natural orbital isovalue (0.03 a.u.) plots, isovalue (0.03 a.u.) plots of the HOMO and HOMO-1 of  $4$ , and spin density ( $\rho_\alpha - \rho_\beta$ ) plots (0.001 a.u.) for the electronic isomers of  $4^{+}$ , as denoted.

Shape of the Natural Orbitals with occ = 1

**B1LYP-40/6-31G(d)**

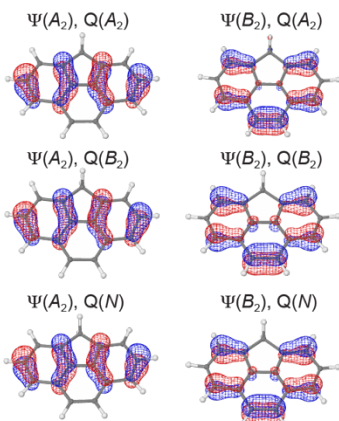

**CASSCF(all- $\pi$ )/6-31G(d)**

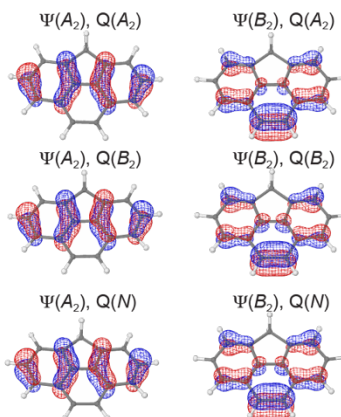

Spin densities in CRs

**B1LYP-40/6-31G(d)+PCM(DCM)**

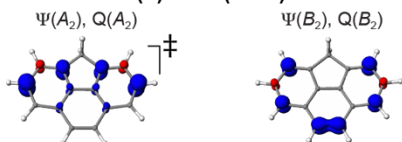

Canonical orbital shapes in neutral molecules

**B1LYP-40/6-31G(d)+PCM(DCM)**

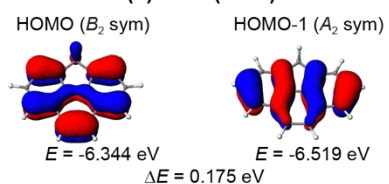

**Figure S6.** Spin density distribution in  $5^{++}$  represented as the singly-occupied natural orbital isovalue (0.03 a.u.) plots, isovalue (0.03 a.u.) plots of the HOMO and HOMO-1 of  $5$ , and spin density ( $\rho_\alpha - \rho_\beta$ ) plots (0.001 a.u.) for the electronic isomers of  $5^{++}$ , as denoted.

Shape of the Natural Orbitals with occ = 1

**B1LYP-40/6-31G(d)**

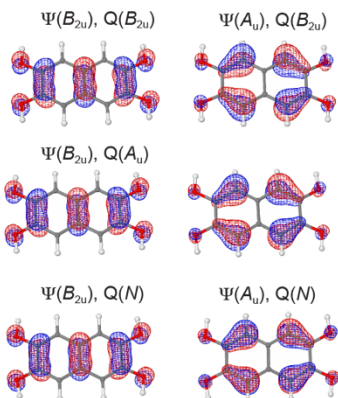

**CASSCF(all- $\pi$ )/6-31G(d)**

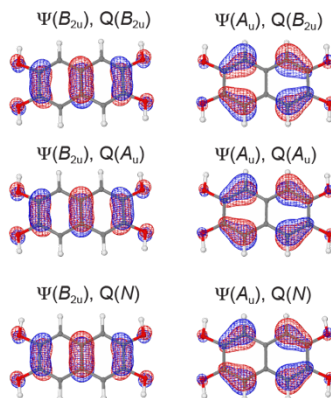

Spin densities in CRs

**B1LYP-40/6-31G(d)+PCM(DCM)**

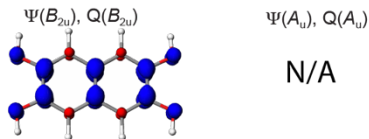

Canonical orbital shapes in neutral molecules

**B1LYP-40/6-31G(d)+PCM(DCM)**

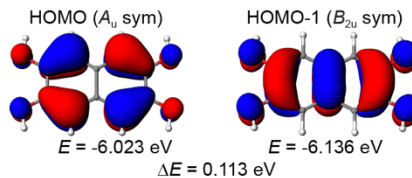

**Figure S7.** Spin density distribution in  $6^{**}$  represented as the singly-occupied natural orbital isovalue (0.03 a.u.) plots, isovalue (0.03 a.u.) plots of the HOMO and HOMO-1 of  $6$ , and spin density ( $\rho_\alpha - \rho_\beta$ ) plots (0.001 a.u.) for the electronic isomers of  $6^{**}$ , as denoted.

Shape of the Natural Orbitals with occ = 1

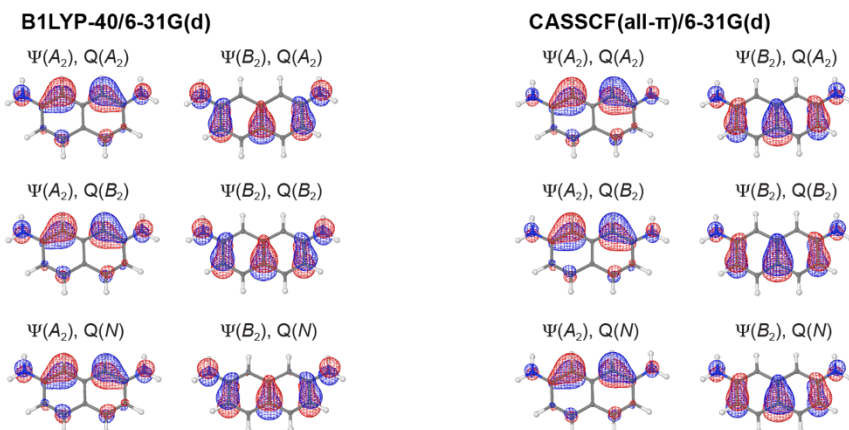

Spin densities in CRs

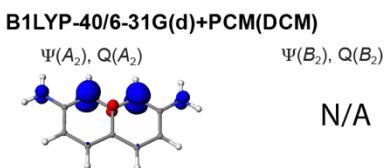

Canonical orbital shapes in neutral molecules

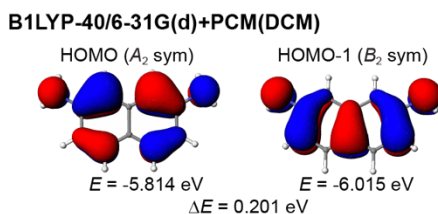

**Figure S8.** Spin density distribution in  $7^{**}$  represented as the singly-occupied natural orbital isovalue (0.03 a.u.) plots, isovalue (0.03 a.u.) plots of the HOMO and HOMO-1 of  $7$ , and spin density ( $\rho_\alpha - \rho_\beta$ ) plots (0.001 a.u.) for the electronic isomers of  $7^{**}$ , as denoted.

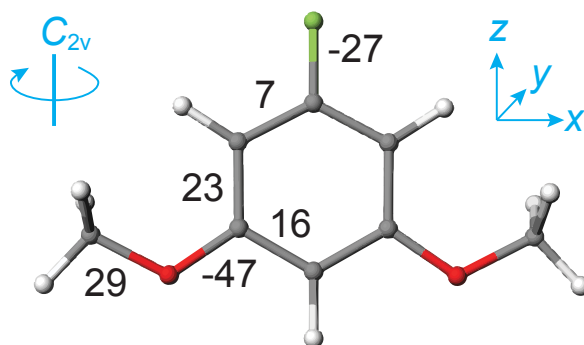

**Figure S9.** The structure of the conical intersection [CASSCF(3;2)/6-31G(d)] of the interconversion of  $1^{**}$  isomers. The values near the bonds in indicate the bond length displacement due to the oxidation (in milli-Å).

# Cation Radical Spectral Properties

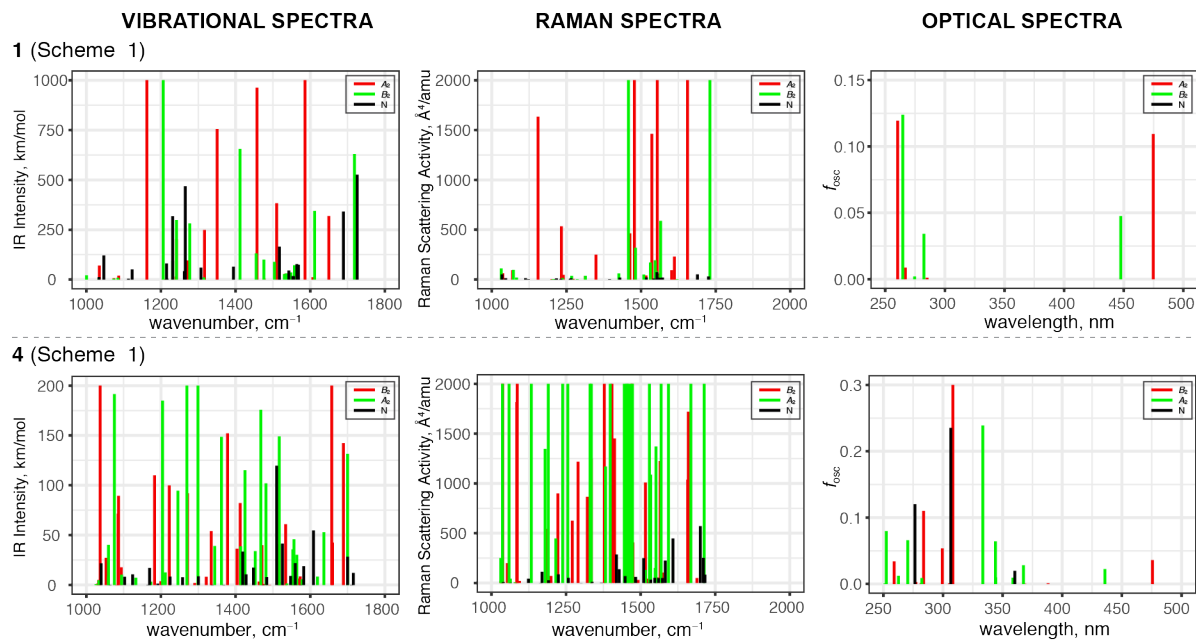

**Figure S10.** Infrared and Raman stick spectra of **1<sup>\*\*</sup>** and **4<sup>\*\*</sup>** obtained from the harmonic frequency analysis (left, central panels). Stick spectra of the optical absorption of **1<sup>\*\*</sup>** and **4<sup>\*\*</sup>** obtained from the time-dependent calculations [B1LYP40/6-31G(d)+PCM(DCM)]. Green and red sticks denote the pick positions/intensities for the electronic isomers with the  $A_2$  and  $B_2$  symmetry, respectively, while black line denotes the corresponding peaks for neutral state.

## Modeling of the single-molecule conductance through phenanthrene

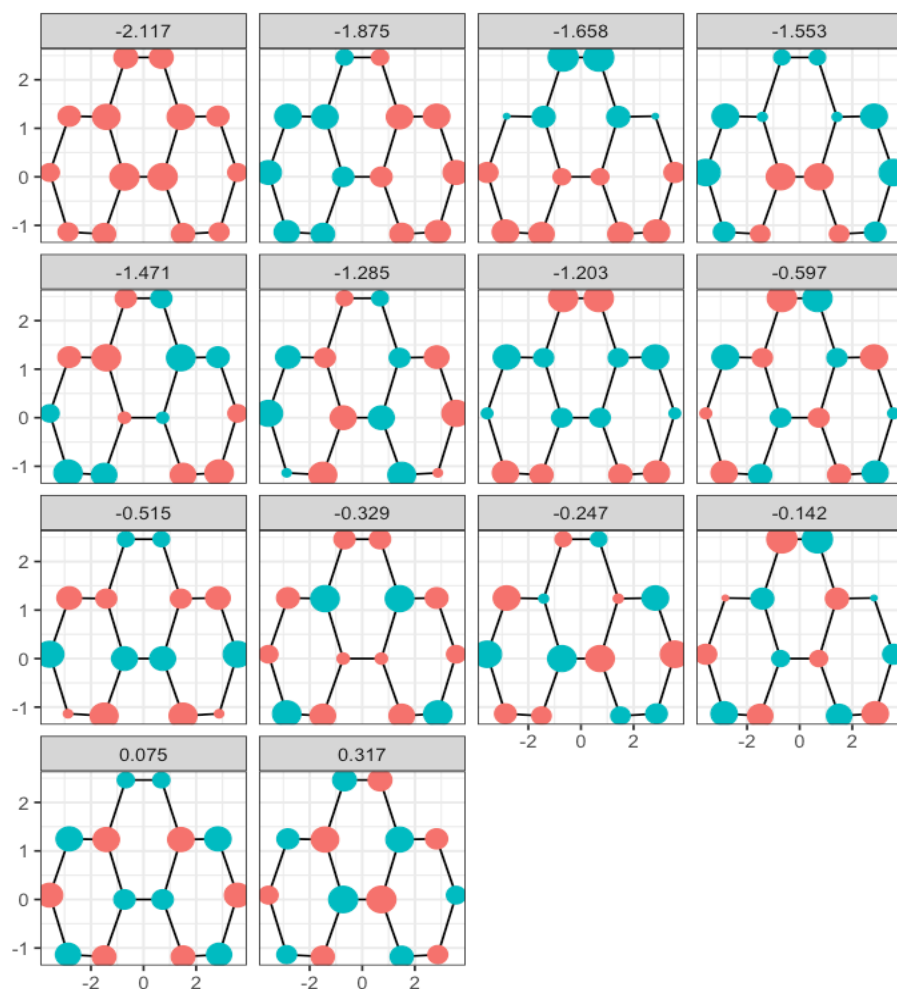

**Figure S11.** Eigenvectors (which represent shapes of molecular orbitals) and eigenvalues (which represent the orbital energies) of the topological Hamiltonian for phenanthrene (HOMO is the orbital with index 7). Each panel represents one molecular orbital juxtaposed with phenanthrene molecule, which is shown in the XY-plane without hydrogen atoms. Colored circles, centered at carbon atoms, show the sign and magnitude of the corresponding  $p_z$  atomic orbital into the molecular orbital.

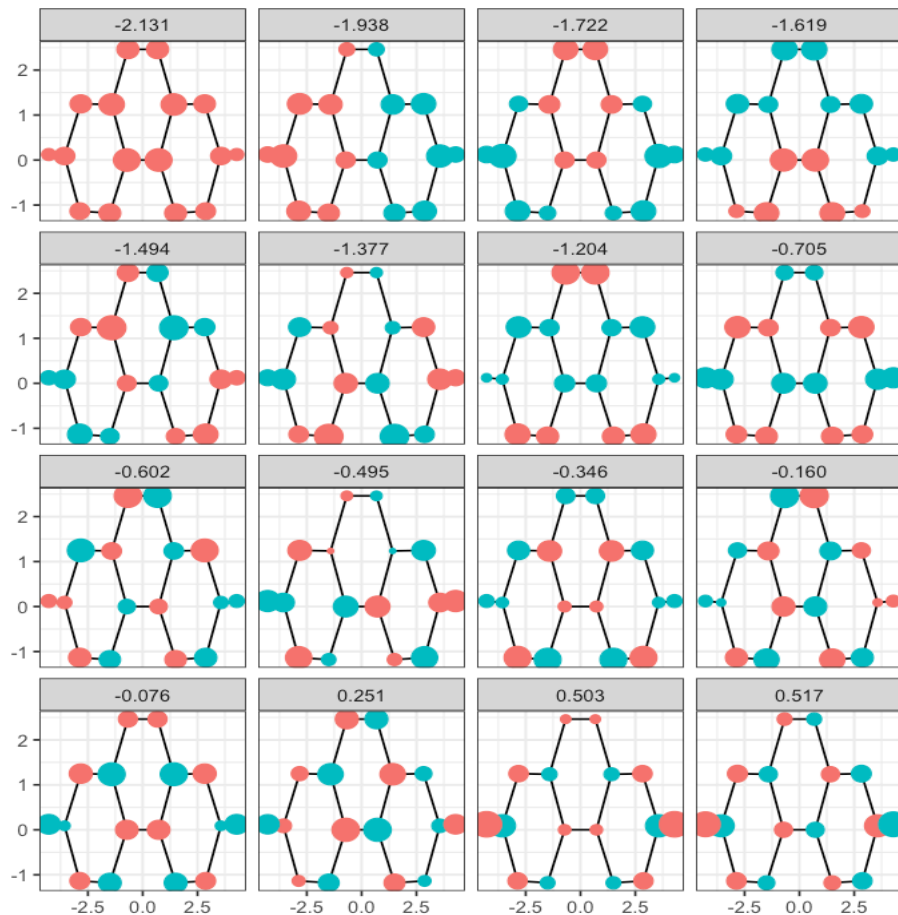

**Figure S12.** Eigenvectors (which represent shapes of molecular orbitals) and eigenvalues (which represent the orbital energies) of the topological Hamiltonian for phenanthrene with two electrodes connected at the 2,7-positions (HOMO is the orbital with index 7). Each panel represents one molecular orbital juxtaposed with phenanthrene molecule, which is shown in the XY-plane without hydrogen atoms. Colored circles, centered at carbon atoms, show the sign and magnitude of the corresponding  $p_z$  atomic orbital into the molecular orbital.



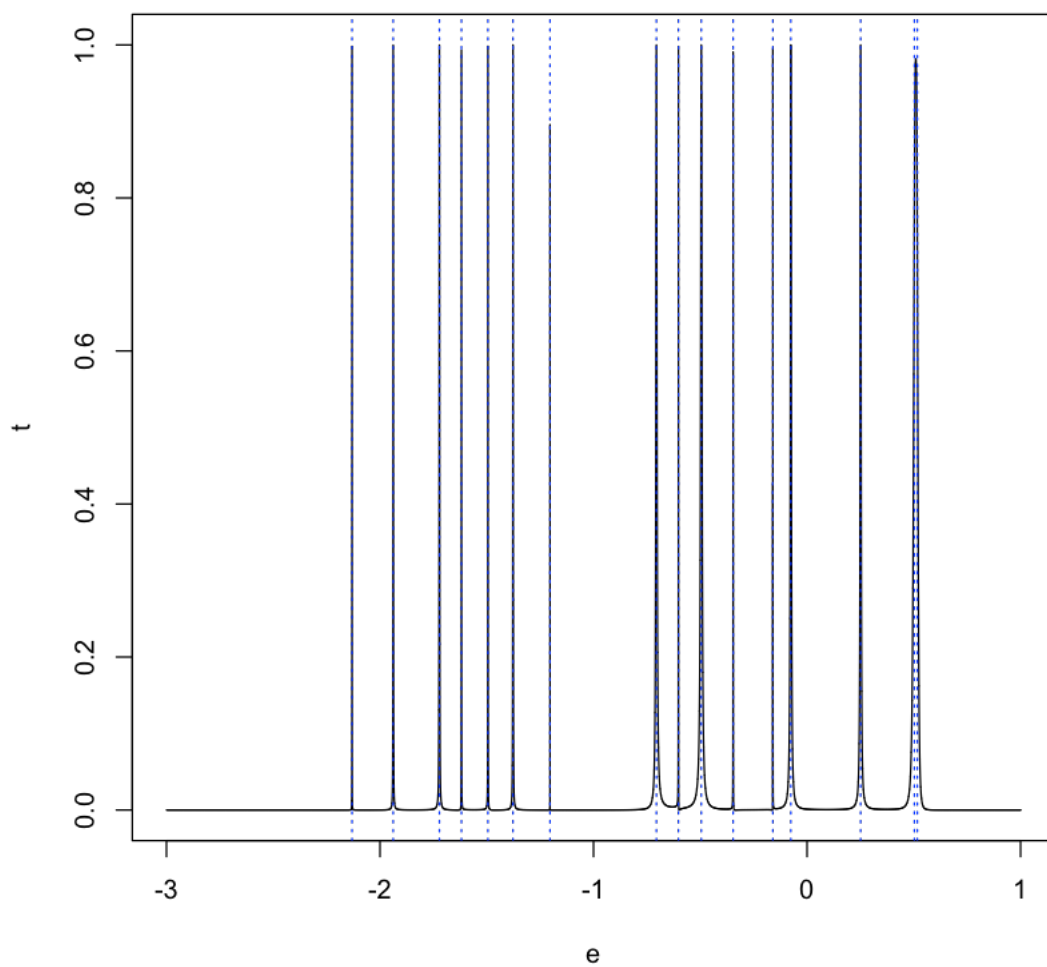

**Figure S13.** Transmission as function of energy for phenanthrene with electrodes connected at the 2,7-positions. Dash lines represent the molecular orbital energies obtained from the Hamiltonian  $H$ .

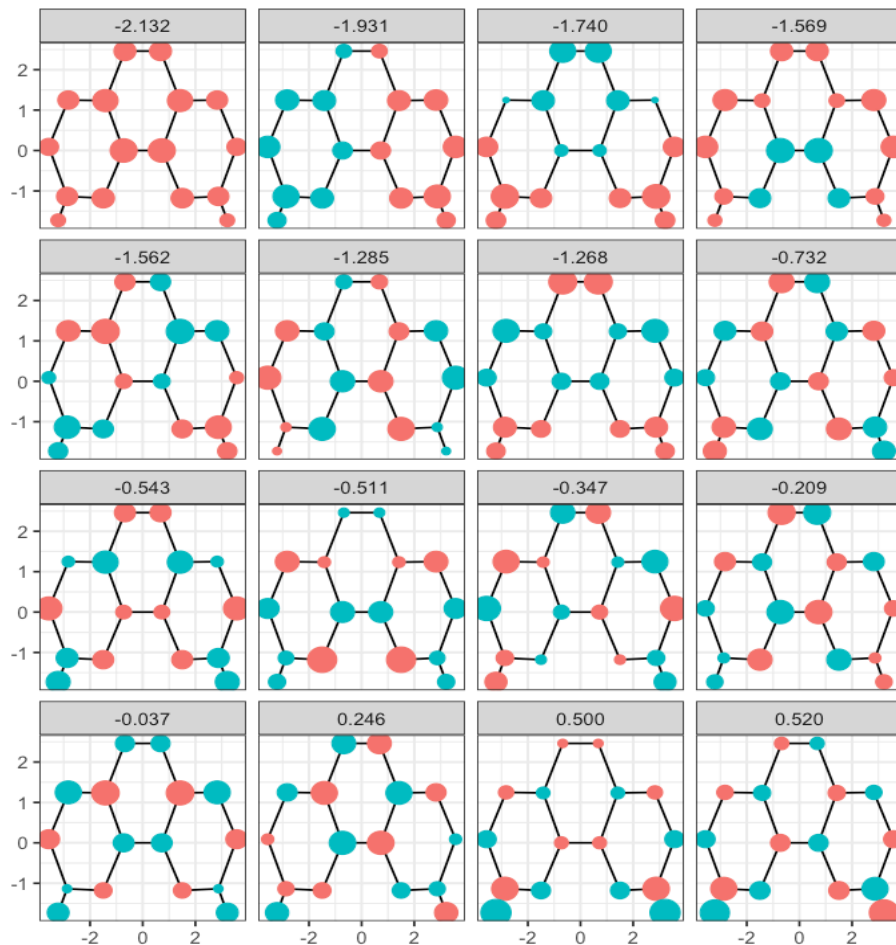

**Figure S14.** Eigenvectors (which represent shapes of molecular orbitals) and eigenvalues (which represent the orbital energies) of the topological Hamiltonian for phenanthrene with two electrodes connected at the 3,6-positions (HOMO is the orbital with index 7). Each panel represents one molecular orbital juxtaposed with phenanthrene molecule, which is shown in the XY-plane without hydrogen atoms. Colored circles, centered at carbon atoms, show the sign and magnitude of the corresponding  $p_z$  atomic orbital into the molecular orbital.

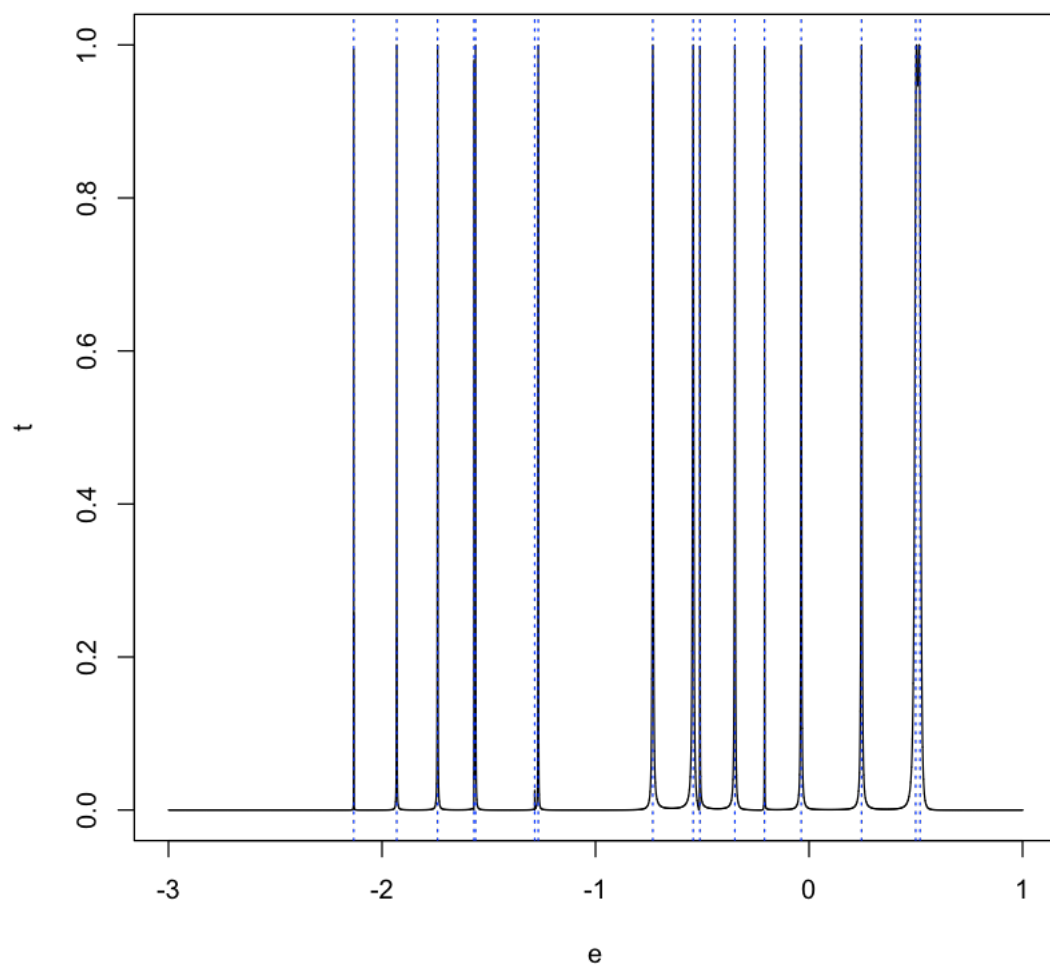

**Figure S15.** Transmission as function of energy for phenanthrene with electrodes connected at the 2,7-positions. Dash lines represent the molecular orbital energies obtained from the Hamiltonian  $H$ .

**Table S2.** Orbital-associated transmissions evaluated as described in the Computational Details

| <b>Orbital Index</b> | <b>2,7</b>   | <b>3,6</b>   |
|----------------------|--------------|--------------|
| 1                    | 0.006        | 0.006        |
| 2                    | 0.028        | 0.023        |
| 3                    | 0.042        | 0.034        |
| 4                    | 0.011        | 0.006        |
| 5                    | 0.017        | 0.030        |
| <b>6 (HOMO-1)</b>    | <b>0.034</b> | <b>0.001</b> |
| <b>7 (HOMO)</b>      | <b>0.001</b> | <b>0.025</b> |
| 8                    | 0.124        | 0.088        |
| 9                    | 0.015        | 0.106        |
| 10                   | 0.156        | 0.022        |
| 11                   | 0.011        | 0.070        |
| 12                   | 0.007        | 0.013        |
| 13                   | 0.110        | 0.068        |
| 14                   | 0.103        | 0.093        |
| 15                   | 0.182        | 0.223        |
| 16                   | 0.154        | 0.194        |

## Cartesian Coordinates of the Optimized Structures

### 1 (Scheme 1)

B1LYP-40/6-31G(d) NEUTRAL; gas (Molpro)

|   |               |               |               |
|---|---------------|---------------|---------------|
| C | 0.0000000000  | 0.0000000000  | -2.7355738471 |
| C | 1.2047115427  | 0.0000000000  | -2.0410956228 |
| C | 1.2200754599  | 0.0000000000  | -0.6443635433 |
| C | 0.0000000000  | 0.0000000000  | 0.0040719016  |
| C | -1.2200754599 | 0.0000000000  | -0.6443635433 |
| C | -1.2047115427 | 0.0000000000  | -2.0410956228 |
| H | 2.1255669806  | 0.0000000000  | -0.0628922192 |
| H | -2.1255669806 | 0.0000000000  | -0.0628922192 |
| O | 2.3223101048  | 0.0000000000  | -2.8040593216 |
| H | 0.0000000000  | 0.0000000000  | -3.8135042887 |
| O | -2.3223101048 | 0.0000000000  | -2.8040593216 |
| C | 3.5777762794  | 0.0000000000  | -2.1646754165 |
| H | 4.3181369877  | 0.0000000000  | -2.9587103782 |
| H | 3.7125169808  | -0.8900747870 | -1.5470770014 |
| H | 3.7125169808  | 0.8900747870  | -1.5470770014 |
| C | -3.5777762794 | 0.0000000000  | -2.1646754165 |
| H | -4.3181369877 | 0.0000000000  | -2.9587103782 |
| H | -3.7125169808 | 0.8900747870  | -1.5470770014 |
| H | -3.7125169808 | -0.8900747870 | -1.5470770014 |
| F | 0.0000000000  | 0.0000000000  | 1.3456372430  |

B1LYP-40/6-31G(d) Cation Radical A2-SYM; gas (Molpro)

|   |               |               |               |
|---|---------------|---------------|---------------|
| C | 0.0000000000  | 0.0000000000  | -2.7628972981 |
| C | 1.1975535415  | 0.0000000000  | -2.0623938191 |
| C | 1.2069261714  | 0.0000000000  | -0.6121661555 |
| C | 0.0000000000  | 0.0000000000  | 0.0591003650  |
| C | -1.2069261714 | 0.0000000000  | -0.6121661555 |
| C | -1.1975535415 | 0.0000000000  | -2.0623938191 |
| H | 2.1265020134  | 0.0000000000  | -0.0504818347 |
| H | -2.1265020134 | 0.0000000000  | -0.0504818347 |
| O | 2.2998886991  | 0.0000000000  | -2.7604238685 |
| H | 0.0000000000  | 0.0000000000  | -3.8403741146 |
| O | -2.2998886991 | 0.0000000000  | -2.7604238685 |
| C | 3.6090561748  | 0.0000000000  | -2.1639733595 |
| H | 4.2942656543  | 0.0000000000  | -3.0018470118 |
| H | 3.7512113082  | -0.8980129344 | -1.5678747417 |
| H | 3.7512113082  | 0.8980129344  | -1.5678747417 |
| C | -3.6090561748 | 0.0000000000  | -2.1639733595 |
| H | -4.2942656543 | 0.0000000000  | -3.0018470118 |
| H | -3.7512113082 | 0.8980129344  | -1.5678747417 |
| H | -3.7512113082 | -0.8980129344 | -1.5678747417 |
| F | 0.0000000000  | 0.0000000000  | 1.3789721125  |

B1LYP-40/6-31G(d) Cation Radical B2-SYM; gas (Molpro)

|   |               |               |               |
|---|---------------|---------------|---------------|
| C | 0.0000000000  | 0.0000000000  | -2.6912260248 |
| C | 1.2531500801  | 0.0000000000  | -1.9813168261 |
| C | 1.2489528205  | 0.0000000000  | -0.6040282063 |
| C | 0.0000000000  | 0.0000000000  | 0.0320190821  |
| C | -1.2489528205 | 0.0000000000  | -0.6040282063 |
| C | -1.2531500801 | 0.0000000000  | -1.9813168261 |
| H | 2.1410800290  | 0.0000000000  | -0.0016419059 |
| H | -2.1410800290 | 0.0000000000  | -0.0016419059 |
| O | 2.3009724002  | 0.0000000000  | -2.7679784471 |
| H | 0.0000000000  | 0.0000000000  | -3.7708314588 |
| O | -2.3009724002 | 0.0000000000  | -2.7679784471 |
| C | 3.6211725881  | 0.0000000000  | -2.2050395231 |
| H | 4.2937361746  | 0.0000000000  | -3.0530120080 |
| H | 3.7681059681  | -0.8959655399 | -1.6051389609 |
| H | 3.7681059681  | 0.8959655399  | -1.6051389609 |
| C | -3.6211725881 | 0.0000000000  | -2.2050395231 |
| H | -4.2937361746 | 0.0000000000  | -3.0530120080 |
| H | -3.7681059681 | 0.8959655399  | -1.6051389609 |
| H | -3.7681059681 | -0.8959655399 | -1.6051389609 |
| F | 0.0000000000  | 0.0000000000  | 1.3373580781  |

B1LYP-40/6-31G(d) NEUTRAL; PCM(DCM) (Gaussian 09)

|   |          |          |          |
|---|----------|----------|----------|
| C | 0.00004  | -1.23115 | -0.00022 |
| C | -1.20609 | -0.53723 | -0.00021 |
| C | -1.22160 | 0.85971  | -0.00019 |
| C | -0.00001 | 1.50464  | -0.00018 |
| C | 1.22160  | 0.85976  | -0.00019 |
| C | 1.20614  | -0.53718 | -0.00020 |
| H | -2.12812 | 1.43968  | -0.00019 |
| H | 2.12810  | 1.43975  | -0.00018 |
| O | -2.32296 | -1.29977 | -0.00022 |
| H | 0.00006  | -2.30969 | -0.00023 |
| O | 2.32303  | -1.29968 | -0.00021 |
| C | -3.58439 | -0.65742 | -0.00022 |
| H | -4.32331 | -1.45198 | -0.00024 |
| H | -3.71559 | -0.04154 | -0.89045 |
| H | -3.71561 | -0.04156 | 0.89002  |
| C | 3.58445  | -0.65729 | -0.00021 |
| H | 4.32340  | -1.45182 | -0.00022 |
| H | 3.71563  | -0.04142 | 0.89003  |
| H | 3.71563  | -0.04140 | -0.89043 |
| F | -0.00004 | 2.84913  | -0.00017 |

B1LYP-40/6-31G(d) Cation Radical A2-SYM; PCM(DCM) (Gaussian 09)

|   |          |          |          |
|---|----------|----------|----------|
| C | 0.00017  | -1.26289 | -0.00020 |
| C | -1.19585 | -0.56252 | -0.00022 |
| C | -1.20660 | 0.88591  | -0.00022 |
| C | 0.00017  | 1.55278  | -0.00021 |
| C | 1.20693  | 0.88592  | -0.00020 |
| C | 1.19620  | -0.56251 | -0.00019 |

|   |          |          |          |
|---|----------|----------|----------|
| H | -2.12613 | 1.44590  | -0.00023 |
| H | 2.12646  | 1.44591  | -0.00020 |
| O | -2.29958 | -1.26118 | -0.00022 |
| H | 0.00018  | -2.33971 | -0.00020 |
| O | 2.29993  | -1.26117 | -0.00019 |
| C | -3.60227 | -0.65033 | -0.00024 |
| H | -4.29607 | -1.48071 | -0.00025 |
| H | -3.73661 | -0.05225 | -0.89712 |
| H | -3.73664 | -0.05225 | 0.89663  |
| C | 3.60261  | -0.65030 | -0.00016 |
| H | 4.29642  | -1.48068 | -0.00014 |
| H | 3.73694  | -0.05223 | 0.89672  |
| H | 3.73698  | -0.05222 | -0.89703 |
| F | 0.00016  | 2.87794  | -0.00022 |

B1LYP-40/6-31G(d) Cation Radical B2-SYM; PCM(DCM) (Gaussian 09)

|   |          |          |          |
|---|----------|----------|----------|
| C | 0.00004  | -1.19945 | -0.00023 |
| C | -1.25049 | -0.48909 | -0.00023 |
| C | -1.24780 | 0.88666  | -0.00023 |
| C | -0.00001 | 1.52018  | -0.00021 |
| C | 1.24780  | 0.88672  | -0.00022 |
| C | 1.25054  | -0.48903 | -0.00023 |
| H | -2.14125 | 1.48557  | -0.00022 |
| H | 2.14123  | 1.48566  | -0.00021 |
| O | -2.30402 | -1.27174 | -0.00023 |
| H | 0.00006  | -2.27785 | -0.00024 |
| O | 2.30409  | -1.27165 | -0.00022 |
| C | -3.61386 | -0.68756 | -0.00022 |
| H | -4.30046 | -1.52394 | -0.00032 |
| H | -3.75120 | -0.08427 | -0.89481 |
| H | -3.75125 | -0.08443 | 0.89447  |
| C | 3.61392  | -0.68743 | -0.00020 |
| H | 4.30054  | -1.52379 | -0.00030 |
| H | 3.75129  | -0.08430 | 0.89449  |
| H | 3.75125  | -0.08413 | -0.89479 |
| F | -0.00005 | 2.82999  | -0.00023 |

## 2 (Scheme 1)

B1LYP-40/6-31G(d) NEUTRAL; gas (Molpro)

|   |               |              |              |
|---|---------------|--------------|--------------|
| C | 0.6760413960  | 0.0000000000 | 2.4608509655 |
| C | 0.7255340067  | 0.0000000000 | 0.0003820061 |
| C | -1.4169847788 | 0.0000000000 | 1.2354822838 |
| C | -0.6760413960 | 0.0000000000 | 2.4608509655 |
| C | 1.4169847788  | 0.0000000000 | 1.2354822838 |
| H | 1.2254310576  | 0.0000000000 | 3.3925671043 |
| C | -0.7255340067 | 0.0000000000 | 0.0003820061 |
| C | 2.8265592907  | 0.0000000000 | 1.2489542395 |
| C | 3.5680378774  | 0.0000000000 | 0.0897179532 |

|   |               |               |               |
|---|---------------|---------------|---------------|
| C | 2.8724386237  | 0.0000000000  | -1.1358157067 |
| H | 3.3297128023  | 0.0000000000  | 2.2075585482  |
| C | 1.4995765912  | 0.0000000000  | -1.1786695940 |
| H | 1.0140535018  | 0.0000000000  | -2.1423513073 |
| C | -1.4995765912 | 0.0000000000  | -1.1786695940 |
| C | -3.5680378774 | 0.0000000000  | 0.0897179532  |
| C | -2.8265592907 | 0.0000000000  | 1.2489542395  |
| H | -3.3297128023 | 0.0000000000  | 2.2075585482  |
| H | -1.2254310576 | 0.0000000000  | 3.3925671043  |
| H | 3.4328904602  | 0.0000000000  | -2.0615753617 |
| C | -2.8724386237 | 0.0000000000  | -1.1358157067 |
| H | -1.0140535018 | 0.0000000000  | -2.1423513073 |
| H | -3.4328904602 | 0.0000000000  | -2.0615753617 |
| C | 5.0729928795  | 0.0000000000  | 0.1100624196  |
| C | -5.0729928795 | 0.0000000000  | 0.1100624196  |
| H | 5.4761707899  | -0.8779306204 | -0.3983988532 |
| H | 5.4761707899  | 0.8779306204  | -0.3983988532 |
| H | 5.4561309093  | 0.0000000000  | 1.1293641557  |
| H | -5.4761707899 | -0.8779306204 | -0.3983988532 |
| H | -5.4561309093 | 0.0000000000  | 1.1293641557  |
| H | -5.4761707899 | 0.8779306204  | -0.3983988532 |

B1LYP-40/6-31G(d) Cation Radical A2-SYM; gas (Molpro)

|   |               |               |               |
|---|---------------|---------------|---------------|
| C | 0.6729061684  | 0.0000000000  | 2.5016570529  |
| C | 0.7051400851  | 0.0000000000  | 0.0090159689  |
| C | -1.4090690966 | 0.0000000000  | 1.2647628183  |
| C | -0.6729061684 | 0.0000000000  | 2.5016570529  |
| C | 1.4090690966  | 0.0000000000  | 1.2647628183  |
| H | 1.2287683296  | 0.0000000000  | 3.4275753305  |
| C | -0.7051400851 | 0.0000000000  | 0.0090159689  |
| C | 2.7956456895  | 0.0000000000  | 1.2671989531  |
| C | 3.5413131004  | 0.0000000000  | 0.0812187803  |
| C | 2.8482022379  | 0.0000000000  | -1.1559455427 |
| H | 3.3173798997  | 0.0000000000  | 2.2136530941  |
| C | 1.4861164218  | 0.0000000000  | -1.1943726219 |
| H | 0.9949618927  | 0.0000000000  | -2.1530725779 |
| C | -1.4861164218 | 0.0000000000  | -1.1943726219 |
| C | -3.5413131004 | 0.0000000000  | 0.0812187803  |
| C | -2.7956456895 | 0.0000000000  | 1.2671989531  |
| H | -3.3173798997 | 0.0000000000  | 2.2136530941  |
| H | -1.2287683296 | 0.0000000000  | 3.4275753305  |
| H | 3.4139676535  | 0.0000000000  | -2.0760902610 |
| C | -2.8482022379 | 0.0000000000  | -1.1559455427 |
| H | -0.9949618927 | 0.0000000000  | -2.1530725779 |
| H | -3.4139676535 | 0.0000000000  | -2.0760902610 |
| C | 5.0342636559  | 0.0000000000  | 0.1026396442  |
| C | -5.0342636559 | 0.0000000000  | 0.1026396442  |
| H | 5.4223958344  | -0.8758666777 | -0.4217046218 |
| H | 5.4223958344  | 0.8758666777  | -0.4217046218 |
| H | 5.4295043839  | 0.0000000000  | 1.1148986049  |



|   |               |               |               |
|---|---------------|---------------|---------------|
| H | -5.4223958344 | -0.8758666777 | -0.4217046218 |
| H | -5.4295043839 | 0.0000000000  | 1.1148986049  |
| H | -5.4223958344 | 0.8758666777  | -0.4217046218 |

B1LYP-40/6-31G(d) Cation Radical B2-SYM; gas (Molpro)

|   |               |               |               |
|---|---------------|---------------|---------------|
| C | 0.6991138613  | 0.0000000000  | 2.4218501388  |
| C | 0.7298279237  | 0.0000000000  | -0.0210379299 |
| C | -1.4257713673 | 0.0000000000  | 1.2273024033  |
| C | -0.6991138613 | 0.0000000000  | 2.4218501388  |
| C | 1.4257713673  | 0.0000000000  | 1.2273024033  |
| H | 1.2276516747  | 0.0000000000  | 3.3644539862  |
| C | -0.7298279237 | 0.0000000000  | -0.0210379299 |
| C | 2.8482135123  | 0.0000000000  | 1.2573038138  |
| C | 3.5991838428  | 0.0000000000  | 0.1016419606  |
| C | 2.8946351110  | 0.0000000000  | -1.1150821956 |
| H | 3.3382397312  | 0.0000000000  | 2.2210877062  |
| C | 1.5012321793  | 0.0000000000  | -1.1767291978 |
| H | 1.0374634530  | 0.0000000000  | -2.1502503257 |
| C | -1.5012321793 | 0.0000000000  | -1.1767291978 |
| C | -3.5991838428 | 0.0000000000  | 0.1016419606  |
| C | -2.8482135123 | 0.0000000000  | 1.2573038138  |
| H | -3.3382397312 | 0.0000000000  | 2.2210877062  |
| H | -1.2276516747 | 0.0000000000  | 3.3644539862  |
| H | 3.4509650794  | 0.0000000000  | -2.0423359139 |
| C | -2.8946351110 | 0.0000000000  | -1.1150821956 |
| H | -1.0374634530 | 0.0000000000  | -2.1502503257 |
| H | -3.4509650794 | 0.0000000000  | -2.0423359139 |
| C | 5.1020259446  | 0.0000000000  | 0.1187961859  |
| C | -5.1020259446 | 0.0000000000  | 0.1187961859  |
| H | 5.4973266495  | -0.8787360730 | -0.3915500671 |
| H | 5.4973266495  | 0.8787360730  | -0.3915500671 |
| H | 5.4873044714  | 0.0000000000  | 1.1358295021  |
| H | -5.4973266495 | -0.8787360730 | -0.3915500671 |
| H | -5.4873044714 | 0.0000000000  | 1.1358295021  |
| H | -5.4973266495 | 0.8787360730  | -0.3915500671 |

B1LYP-40/6-31G(d) NEUTRAL; PCM(DCM) (Gaussian 09)

|   |          |          |          |
|---|----------|----------|----------|
| C | 0.67627  | 2.11766  | 0.00008  |
| C | 0.72588  | -0.34407 | -0.00002 |
| C | -1.41736 | 0.89160  | 0.00004  |
| C | -0.67627 | 2.11766  | 0.00008  |
| C | 1.41736  | 0.89160  | 0.00003  |
| H | 1.22545  | 3.04940  | 0.00012  |
| C | -0.72588 | -0.34407 | -0.00001 |
| C | 2.82753  | 0.90589  | 0.00003  |
| C | 3.56933  | -0.25386 | -0.00002 |
| C | 2.87338  | -1.47992 | -0.00007 |
| H | 3.33039  | 1.86453  | 0.00006  |
| C | 1.50005  | -1.52374 | -0.00007 |
| H | 1.01585  | -2.48810 | -0.00011 |

|   |          |          |          |
|---|----------|----------|----------|
| C | -1.50005 | -1.52374 | -0.00006 |
| C | -3.56933 | -0.25386 | -0.00000 |
| C | -2.82752 | 0.90589  | 0.00004  |
| H | -3.33038 | 1.86453  | 0.00008  |
| H | -1.22544 | 3.04940  | 0.00012  |
| H | 3.43374  | -2.40551 | -0.00011 |
| C | -2.87338 | -1.47991 | -0.00006 |
| H | -1.01585 | -2.48810 | -0.00010 |
| H | -3.43374 | -2.40550 | -0.00009 |
| C | 5.07415  | -0.23352 | -0.00003 |
| C | -5.07414 | -0.23351 | 0.00000  |
| H | 5.47584  | -0.74363 | -0.87734 |
| H | 5.47584  | -0.74369 | 0.87725  |
| H | 5.45689  | 0.78564  | 0.00001  |
| H | -5.47584 | -0.74362 | -0.87731 |
| H | -5.45689 | 0.78564  | 0.00004  |
| H | -5.47584 | -0.74368 | 0.87728  |

B1LYP-40/6-31G(d) Cation Radical A2-SYM; PCM(DCM) (Gaussian 09)

|   |          |          |          |
|---|----------|----------|----------|
| C | 0.67280  | 2.15713  | 0.00166  |
| C | 0.70476  | -0.33513 | -0.00489 |
| C | -1.40822 | 0.92026  | -0.00042 |
| C | -0.67269 | 2.15717  | -0.00226 |
| C | 1.40826  | 0.92017  | 0.00007  |
| H | 1.22943  | 3.08223  | 0.00368  |
| C | -0.70478 | -0.33510 | 0.00478  |
| C | 2.79412  | 0.92255  | 0.00323  |
| C | 3.53751  | -0.26414 | -0.00329 |
| C | 2.84601  | -1.50048 | -0.01933 |
| H | 3.31670  | 1.86797  | 0.01079  |
| C | 1.48395  | -1.53909 | -0.02079 |
| H | 0.99215  | -2.49682 | -0.03891 |
| C | -1.48404 | -1.53901 | 0.02091  |
| C | -3.53753 | -0.26392 | 0.00318  |
| C | -2.79409 | 0.92271  | -0.00357 |
| H | -3.31661 | 1.86816  | -0.01130 |
| H | -1.22927 | 3.08230  | -0.00446 |
| H | 3.41152  | -2.42022 | -0.03115 |
| C | -2.84609 | -1.50031 | 0.01945  |
| H | -0.99229 | -2.49676 | 0.03921  |
| H | -3.41165 | -2.42001 | 0.03144  |
| C | 5.03011  | -0.24124 | 0.00555  |
| C | -5.03013 | -0.24097 | -0.00566 |
| H | 5.42295  | -0.77179 | -0.86371 |
| H | 5.41033  | -0.75996 | 0.88779  |
| H | 5.42117  | 0.77250  | 0.00241  |
| H | -5.41036 | -0.75974 | -0.88787 |
| H | -5.42115 | 0.77279  | -0.00261 |
| H | -5.42299 | -0.77144 | 0.86364  |

B1LYP-40/6-31G(d) Cation Radical B2-SYM; PCM(DCM) (Gaussian 09)

|   |          |          |          |
|---|----------|----------|----------|
| C | 0.69900  | 2.07710  | 0.00009  |
| C | 0.72977  | -0.36601 | -0.00001 |
| C | -1.42445 | 0.88198  | 0.00004  |
| C | -0.69905 | 2.07709  | 0.00009  |
| C | 1.42441  | 0.88200  | 0.00004  |
| H | 1.22722  | 3.01886  | 0.00013  |
| C | -0.72980 | -0.36602 | -0.00001 |
| C | 2.84570  | 0.91318  | 0.00004  |
| C | 3.59443  | -0.24327 | -0.00001 |
| C | 2.89225  | -1.46033 | -0.00006 |
| H | 3.33471  | 1.87709  | 0.00007  |
| C | 1.49972  | -1.52250 | -0.00006 |
| H | 1.03657  | -2.49586 | -0.00010 |
| C | -1.49973 | -1.52252 | -0.00005 |
| C | -3.59445 | -0.24333 | 0.00000  |
| C | -2.84574 | 0.91314  | 0.00005  |
| H | -3.33476 | 1.87704  | 0.00008  |
| H | -1.22729 | 3.01884  | 0.00013  |
| H | 3.44824  | -2.38727 | -0.00010 |
| C | -2.89226 | -1.46037 | -0.00004 |
| H | -1.03656 | -2.49588 | -0.00009 |
| H | -3.44824 | -2.38732 | -0.00008 |
| C | 5.09706  | -0.22433 | -0.00001 |
| C | -5.09709 | -0.22440 | 0.00001  |
| H | 5.49196  | -0.73540 | -0.87839 |
| H | 5.49196  | -0.73544 | 0.87835  |
| H | 5.47822  | 0.79428  | 0.00001  |
| H | -5.49198 | -0.73547 | -0.87837 |
| H | -5.47826 | 0.79420  | 0.00003  |
| H | -5.49198 | -0.73551 | 0.87836  |

3 (Scheme 1)

B1LYP-40/6-31G(d) NEUTRAL; gas (Molpro)

|   |               |              |              |
|---|---------------|--------------|--------------|
| C | 0.6755411901  | 4.9004594601 | 0.0000000000 |
| C | -0.6755411901 | 4.9004594601 | 0.0000000000 |
| C | -1.4267139855 | 3.6726295764 | 0.0000000000 |
| C | -0.7103436901 | 2.4445977784 | 0.0000000000 |
| C | 0.7103436901  | 2.4445977784 | 0.0000000000 |
| C | 1.4267139855  | 3.6726295764 | 0.0000000000 |
| H | -1.2219837776 | 5.8337341889 | 0.0000000000 |
| H | 1.2219837776  | 5.8337341889 | 0.0000000000 |
| C | -2.8154220410 | 3.6521420535 | 0.0000000000 |
| C | -3.5140488975 | 2.4433971020 | 0.0000000000 |
| C | -2.8264871245 | 1.2367280422 | 0.0000000000 |
| C | -1.4252074053 | 1.2228052404 | 0.0000000000 |
| H | -3.3823981713 | 4.5717211301 | 0.0000000000 |
| H | -3.3540057690 | 0.2957101065 | 0.0000000000 |

|   |               |               |               |
|---|---------------|---------------|---------------|
| C | -0.6774372204 | -0.0005858042 | 0.0000000000  |
| C | 0.6774372204  | -0.0005858042 | 0.0000000000  |
| C | 1.4252074053  | 1.2228052404  | 0.0000000000  |
| H | -1.2212975086 | -0.9356687797 | 0.0000000000  |
| H | 1.2212975086  | -0.9356687797 | 0.0000000000  |
| C | 2.8154220410  | 3.6521420535  | 0.0000000000  |
| C | 3.5140488975  | 2.4433971020  | 0.0000000000  |
| C | 2.8264871245  | 1.2367280422  | 0.0000000000  |
| H | 3.3540057690  | 0.2957101065  | 0.0000000000  |
| H | 3.3823981713  | 4.5717211301  | 0.0000000000  |
| O | 4.8676264369  | 2.5542746402  | 0.0000000000  |
| O | -4.8676264369 | 2.5542746402  | 0.0000000000  |
| C | 5.6397287169  | 1.3780238868  | 0.0000000000  |
| H | 6.6771516838  | 1.6988714275  | 0.0000000000  |
| H | 5.4508560596  | 0.7733249755  | -0.8897293193 |
| H | 5.4508560596  | 0.7733249755  | 0.8897293193  |
| C | -5.6397287169 | 1.3780238868  | 0.0000000000  |
| H | -6.6771516838 | 1.6988714275  | 0.0000000000  |
| H | -5.4508560596 | 0.7733249755  | 0.8897293193  |
| H | -5.4508560596 | 0.7733249755  | -0.8897293193 |

B1LYP-40/6-31G(d) Cation Radical A2-SYM; gas (Molpro)

|   |               |               |              |
|---|---------------|---------------|--------------|
| C | 0.6727854442  | 4.9200738167  | 0.0000000000 |
| C | -0.6727854442 | 4.9200738167  | 0.0000000000 |
| C | -1.4203100908 | 3.6838305775  | 0.0000000000 |
| C | -0.6959236046 | 2.4392903611  | 0.0000000000 |
| C | 0.6959236046  | 2.4392903611  | 0.0000000000 |
| C | 1.4203100908  | 3.6838305775  | 0.0000000000 |
| H | -1.2242492131 | 5.8487265184  | 0.0000000000 |
| H | 1.2242492131  | 5.8487265184  | 0.0000000000 |
| C | -2.7923064364 | 3.6631482516  | 0.0000000000 |
| C | -3.4946659747 | 2.4343130412  | 0.0000000000 |
| C | -2.8000029719 | 1.2073309638  | 0.0000000000 |
| C | -1.4199841105 | 1.1974657135  | 0.0000000000 |
| H | -3.3713581278 | 4.5740023345  | 0.0000000000 |
| H | -3.3388740881 | 0.2738055388  | 0.0000000000 |
| C | -0.6734505054 | -0.0372784848 | 0.0000000000 |
| C | 0.6734505054  | -0.0372784848 | 0.0000000000 |
| C | 1.4199841105  | 1.1974657135  | 0.0000000000 |
| H | -1.2228726447 | -0.9672837699 | 0.0000000000 |
| H | 1.2228726447  | -0.9672837699 | 0.0000000000 |
| C | 2.7923064364  | 3.6631482516  | 0.0000000000 |
| C | 3.4946659747  | 2.4343130412  | 0.0000000000 |
| C | 2.8000029719  | 1.2073309638  | 0.0000000000 |
| H | 3.3388740881  | 0.2738055388  | 0.0000000000 |
| H | 3.3713581278  | 4.5740023345  | 0.0000000000 |
| O | 4.8085237115  | 2.5428579372  | 0.0000000000 |
| O | -4.8085237115 | 2.5428579372  | 0.0000000000 |
| C | 5.6464930164  | 1.3861326098  | 0.0000000000 |
| H | 6.6603078049  | 1.7671695715  | 0.0000000000 |

|   |               |              |               |
|---|---------------|--------------|---------------|
| H | 5.4743592594  | 0.7909525094 | -0.8947815621 |
| H | 5.4743592594  | 0.7909525094 | 0.8947815621  |
| C | -5.6464930164 | 1.3861326098 | 0.0000000000  |
| H | -6.6603078049 | 1.7671695715 | 0.0000000000  |
| H | -5.4743592594 | 0.7909525094 | 0.8947815621  |
| H | -5.4743592594 | 0.7909525094 | -0.8947815621 |

B1LYP-40/6-31G(d) Cation Radical B2-SYM; gas (Molpro)

|   |               |               |               |
|---|---------------|---------------|---------------|
| C | 0.6888480797  | 4.8788511122  | 0.0000000000  |
| C | -0.6888480797 | 4.8788511122  | 0.0000000000  |
| C | -1.4153475046 | 3.6645415110  | 0.0000000000  |
| C | -0.7043455134 | 2.4387496097  | 0.0000000000  |
| C | 0.7043455134  | 2.4387496097  | 0.0000000000  |
| C | 1.4153475046  | 3.6645415110  | 0.0000000000  |
| H | -1.2268841634 | 5.8156532690  | 0.0000000000  |
| H | 1.2268841634  | 5.8156532690  | 0.0000000000  |
| C | -2.8259625344 | 3.6418398570  | 0.0000000000  |
| C | -3.5381643382 | 2.4358104103  | 0.0000000000  |
| C | -2.8389243457 | 1.2345588274  | 0.0000000000  |
| C | -1.4198760774 | 1.2182641266  | 0.0000000000  |
| H | -3.3880806421 | 4.5643391567  | 0.0000000000  |
| H | -3.3638326482 | 0.2923791152  | 0.0000000000  |
| C | -0.6898171106 | 0.0096106945  | 0.0000000000  |
| C | 0.6898171106  | 0.0096106945  | 0.0000000000  |
| C | 1.4198760774  | 1.2182641266  | 0.0000000000  |
| H | -1.2235684117 | -0.9298106633 | 0.0000000000  |
| H | 1.2235684117  | -0.9298106633 | 0.0000000000  |
| C | 2.8259625344  | 3.6418398570  | 0.0000000000  |
| C | 3.5381643382  | 2.4358104103  | 0.0000000000  |
| C | 2.8389243457  | 1.2345588274  | 0.0000000000  |
| H | 3.3638326482  | 0.2923791152  | 0.0000000000  |
| H | 3.3880806421  | 4.5643391567  | 0.0000000000  |
| O | 4.8715135940  | 2.5552535154  | 0.0000000000  |
| O | -4.8715135940 | 2.5552535154  | 0.0000000000  |
| C | 5.6757342765  | 1.3857563751  | 0.0000000000  |
| H | 6.7015128991  | 1.7354352099  | 0.0000000000  |
| H | 5.4955287222  | 0.7871289368  | -0.8935430971 |
| H | 5.4955287222  | 0.7871289368  | 0.8935430971  |
| C | -5.6757342765 | 1.3857563751  | 0.0000000000  |
| H | -6.7015128991 | 1.7354352099  | 0.0000000000  |
| H | -5.4955287222 | 0.7871289368  | 0.8935430971  |
| H | -5.4955287222 | 0.7871289368  | -0.8935430971 |

B1LYP-40/6-31G(d) NEUTRAL; PCM(DCM) (Gaussian 09)

|   |          |         |         |
|---|----------|---------|---------|
| C | 0.67582  | 2.59506 | 0.00002 |
| C | -0.67582 | 2.59506 | 0.00010 |
| C | -1.42684 | 1.36662 | 0.00021 |
| C | -0.71062 | 0.13846 | 0.00023 |
| C | 0.71062  | 0.13846 | 0.00015 |
| C | 1.42684  | 1.36662 | 0.00004 |

|   |          |          |          |
|---|----------|----------|----------|
| H | -1.22168 | 3.52856  | 0.00009  |
| H | 1.22168  | 3.52856  | -0.00006 |
| C | -2.81627 | 1.34591  | 0.00030  |
| C | -3.51474 | 0.13644  | 0.00040  |
| C | -2.82694 | -1.07099 | 0.00042  |
| C | -1.42570 | -1.08387 | 0.00034  |
| H | -3.38004 | 2.26774  | 0.00028  |
| H | -3.35486 | -2.01151 | 0.00050  |
| C | -0.67756 | -2.30825 | 0.00036  |
| C | 0.67756  | -2.30825 | 0.00027  |
| C | 1.42570  | -1.08387 | 0.00017  |
| H | -1.22131 | -3.24310 | 0.00044  |
| H | 1.22131  | -3.24310 | 0.00029  |
| C | 2.81627  | 1.34591  | -0.00004 |
| C | 3.51474  | 0.13644  | -0.00002 |
| C | 2.82693  | -1.07099 | 0.00008  |
| H | 3.35486  | -2.01151 | 0.00010  |
| H | 3.38004  | 2.26774  | -0.00012 |
| O | 4.86784  | 0.24551  | -0.00011 |
| O | -4.86784 | 0.24551  | 0.00047  |
| C | 5.64200  | -0.93732 | -0.00010 |
| H | 6.67890  | -0.61680 | -0.00017 |
| H | 5.45021  | -1.53866 | -0.88985 |
| H | 5.45032  | -1.53857 | 0.88974  |
| C | -5.64200 | -0.93732 | 0.00057  |
| H | -6.67890 | -0.61680 | 0.00061  |
| H | -5.45022 | -1.53858 | 0.89038  |
| H | -5.45032 | -1.53866 | -0.88921 |

B1LYP-40/6-31G(d) Cation Radical A2-SYM; PCM(DCM) (Gaussian 09)

This structure is a transition state.

|   |          |          |          |
|---|----------|----------|----------|
| C | 0.67272  | 2.61564  | 0.00003  |
| C | -0.67271 | 2.61564  | 0.00010  |
| C | -1.41980 | 1.37931  | 0.00021  |
| C | -0.69567 | 0.13524  | 0.00023  |
| C | 0.69568  | 0.13524  | 0.00015  |
| C | 1.41981  | 1.37932  | 0.00005  |
| H | -1.22452 | 3.54390  | 0.00009  |
| H | 1.22452  | 3.54391  | -0.00006 |
| C | -2.79155 | 1.35855  | 0.00029  |
| C | -3.49187 | 0.12948  | 0.00039  |
| C | -2.79867 | -1.09725 | 0.00042  |
| C | -1.41934 | -1.10645 | 0.00034  |
| H | -3.36810 | 2.27070  | 0.00028  |
| H | -3.33728 | -2.03040 | 0.00049  |
| C | -0.67334 | -2.34141 | 0.00036  |
| C | 0.67334  | -2.34140 | 0.00029  |
| C | 1.41934  | -1.10644 | 0.00018  |
| H | -1.22372 | -3.27048 | 0.00044  |
| H | 1.22372  | -3.27047 | 0.00030  |

|   |          |          |          |
|---|----------|----------|----------|
| C | 2.79157  | 1.35857  | -0.00004 |
| C | 3.49188  | 0.12953  | -0.00002 |
| C | 2.79865  | -1.09722 | 0.00009  |
| H | 3.33727  | -2.03037 | 0.00011  |
| H | 3.36811  | 2.27073  | -0.00012 |
| O | 4.80782  | 0.23485  | -0.00011 |
| O | -4.80781 | 0.23485  | 0.00046  |
| C | 5.63399  | -0.93245 | -0.00010 |
| H | 6.65170  | -0.56244 | -0.00019 |
| H | 5.45360  | -1.52531 | -0.89378 |
| H | 5.45372  | -1.52523 | 0.89365  |
| C | -5.63400 | -0.93244 | 0.00056  |
| H | -6.65171 | -0.56240 | 0.00061  |
| H | -5.45362 | -1.52522 | 0.89430  |
| H | -5.45374 | -1.52530 | -0.89314 |

B1LYP-40/6-31G(d) Cation Radical B2-SYM; PCM(DCM) (Gaussian 09)

|   |          |          |          |
|---|----------|----------|----------|
| C | 0.68897  | 2.57531  | -0.00001 |
| C | -0.68839 | 2.57544  | 0.00007  |
| C | -1.41432 | 1.36134  | 0.00019  |
| C | -0.70413 | 0.13585  | 0.00023  |
| C | 0.70422  | 0.13571  | 0.00016  |
| C | 1.41465  | 1.36106  | 0.00004  |
| H | -1.22601 | 3.51191  | 0.00004  |
| H | 1.22677  | 3.51166  | -0.00010 |
| C | -2.82485 | 1.33860  | 0.00026  |
| C | -3.53308 | 0.13312  | 0.00038  |
| C | -2.83671 | -1.06896 | 0.00042  |
| C | -1.41829 | -1.08482 | 0.00035  |
| H | -3.38279 | 2.26312  | 0.00023  |
| H | -3.36041 | -2.01128 | 0.00052  |
| C | -0.68991 | -2.29422 | 0.00039  |
| C | 0.68950  | -2.29435 | 0.00032  |
| C | 1.41813  | -1.08510 | 0.00020  |
| H | -1.22435 | -3.23264 | 0.00049  |
| H | 1.22376  | -3.23288 | 0.00036  |
| C | 2.82518  | 1.33803  | -0.00004 |
| C | 3.53317  | 0.13241  | 0.00000  |
| C | 2.83656  | -1.06954 | 0.00012  |
| H | 3.36006  | -2.01196 | 0.00016  |
| H | 3.38331  | 2.26244  | -0.00014 |
| O | 4.87286  | 0.24596  | -0.00007 |
| O | -4.87275 | 0.24694  | 0.00044  |
| C | 5.66077  | -0.93547 | -0.00013 |
| H | 6.69196  | -0.60119 | -0.00025 |
| H | 5.47127  | -1.53248 | -0.89208 |
| H | 5.47147  | -1.53244 | 0.89189  |
| C | -5.66090 | -0.93433 | 0.00045  |
| H | -6.69203 | -0.59985 | 0.00043  |
| H | -5.47163 | -1.53134 | 0.89246  |

H -5.47160 -1.53138 -0.89152

#### 4 (Scheme 1)

B1LYP-40/6-31G(d) NEUTRAL; gas (Molpro)

|   |               |               |               |
|---|---------------|---------------|---------------|
| C | -0.8224933887 | 0.0000000000  | 1.1503758701  |
| C | 1.3983450730  | 0.0000000000  | 0.0000000000  |
| C | 1.1996258466  | 0.0000000000  | 2.4203457238  |
| C | -0.2139057623 | 0.0000000000  | 2.3760352178  |
| C | 0.0003716593  | 0.0000000000  | 0.0000000000  |
| C | 2.0148756946  | 0.0000000000  | 1.3029506202  |
| C | -0.8224933887 | 0.0000000000  | -1.1503758701 |
| C | -0.2139057623 | 0.0000000000  | -2.3760352178 |
| C | 1.1996258466  | 0.0000000000  | -2.4203457238 |
| C | 2.0148756946  | 0.0000000000  | -1.3029506202 |
| C | -2.2101423710 | 0.0000000000  | 0.6765265259  |
| C | -2.2101423710 | 0.0000000000  | -0.6765265259 |
| H | -3.0796281477 | 0.0000000000  | 1.3145033619  |
| H | -3.0796281477 | 0.0000000000  | -1.3145033619 |
| H | 1.6733894104  | 0.0000000000  | 3.3924769532  |
| H | 1.6733894104  | 0.0000000000  | -3.3924769532 |
| H | -0.7763641852 | 0.0000000000  | 3.2999858781  |
| H | -0.7763641852 | 0.0000000000  | -3.2999858781 |
| C | 3.5058574531  | 0.0000000000  | 1.5294356492  |
| H | 3.9888768700  | -0.8772065470 | 1.0993731445  |
| H | 3.9888768700  | 0.8772065470  | 1.0993731445  |
| H | 3.7206783439  | 0.0000000000  | 2.5964438106  |
| C | 3.5058574531  | 0.0000000000  | -1.5294356492 |
| H | 3.7206783439  | 0.0000000000  | -2.5964438106 |
| H | 3.9888768700  | 0.8772065470  | -1.0993731445 |
| H | 3.9888768700  | -0.8772065470 | -1.0993731445 |

B1LYP-40/6-31G(d) Cation Radical A2-SYM; gas (Molpro)

|   |               |              |               |
|---|---------------|--------------|---------------|
| C | -0.8124954468 | 0.0000000000 | 1.1400174656  |
| C | 1.4096484721  | 0.0000000000 | 0.0000000000  |
| C | 1.1870420979  | 0.0000000000 | 2.4360195961  |
| C | -0.2010444681 | 0.0000000000 | 2.3918255511  |
| C | 0.0064505206  | 0.0000000000 | 0.0000000000  |
| C | 2.0277480251  | 0.0000000000 | 1.2907335457  |
| C | -0.8124954468 | 0.0000000000 | -1.1400174656 |
| C | -0.2010444681 | 0.0000000000 | -2.3918255511 |
| C | 1.1870420979  | 0.0000000000 | -2.4360195961 |
| C | 2.0277480251  | 0.0000000000 | -1.2907335457 |
| C | -2.2234691458 | 0.0000000000 | 0.6711606840  |
| C | -2.2234691458 | 0.0000000000 | -0.6711606840 |
| H | -3.0840211693 | 0.0000000000 | 1.3187332963  |
| H | -3.0840211693 | 0.0000000000 | -1.3187332963 |
| H | 1.6690395022  | 0.0000000000 | 3.4023449241  |
| H | 1.6690395022  | 0.0000000000 | -3.4023449241 |
| H | -0.7716146834 | 0.0000000000 | 3.3088371950  |
| H | -0.7716146834 | 0.0000000000 | -3.3088371950 |



|   |              |               |               |
|---|--------------|---------------|---------------|
| C | 3.5040014230 | 0.0000000000  | 1.5293910476  |
| H | 3.9811257393 | -0.8766153527 | 1.0890243079  |
| H | 3.9811257393 | 0.8766153527  | 1.0890243079  |
| H | 3.7235178902 | 0.0000000000  | 2.5931012488  |
| C | 3.5040014230 | 0.0000000000  | -1.5293910476 |
| H | 3.7235178902 | 0.0000000000  | -2.5931012488 |
| H | 3.9811257393 | 0.8766153527  | -1.0890243079 |
| H | 3.9811257393 | -0.8766153527 | -1.0890243079 |

B1LYP-40/6-31G(d) Cation Radical B2-SYM; gas (Molpro)

|   |               |               |               |
|---|---------------|---------------|---------------|
| C | -0.8255286255 | 0.0000000000  | 1.1671639983  |
| C | 1.3992578889  | 0.0000000000  | 0.0000000000  |
| C | 1.1865590117  | 0.0000000000  | 2.4422394749  |
| C | -0.2078585830 | 0.0000000000  | 2.4096823474  |
| C | 0.0041730856  | 0.0000000000  | 0.0000000000  |
| C | 2.0083263578  | 0.0000000000  | 1.3060229788  |
| C | -0.8255286255 | 0.0000000000  | -1.1671639983 |
| C | -0.2078585830 | 0.0000000000  | -2.4096823474 |
| C | 1.1865590117  | 0.0000000000  | -2.4422394749 |
| C | 2.0083263578  | 0.0000000000  | -1.3060229788 |
| C | -2.1596312398 | 0.0000000000  | 0.7125658675  |
| C | -2.1596312398 | 0.0000000000  | -0.7125658675 |
| H | -3.0455264937 | 0.0000000000  | 1.3275037334  |
| H | -3.0455264937 | 0.0000000000  | -1.3275037334 |
| H | 1.6714509357  | 0.0000000000  | 3.4065673073  |
| H | 1.6714509357  | 0.0000000000  | -3.4065673073 |
| H | -0.7734554847 | 0.0000000000  | 3.3299830124  |
| H | -0.7734554847 | 0.0000000000  | -3.3299830124 |
| C | 3.4912209441  | 0.0000000000  | 1.5364729809  |
| H | 3.9652106019  | -0.8780705385 | 1.0993281821  |
| H | 3.9652106019  | 0.8780705385  | 1.0993281821  |
| H | 3.7113114862  | 0.0000000000  | 2.6001531471  |
| C | 3.4912209441  | 0.0000000000  | -1.5364729809 |
| H | 3.7113114862  | 0.0000000000  | -2.6001531471 |
| H | 3.9652106019  | 0.8780705385  | -1.0993281821 |
| H | 3.9652106019  | -0.8780705385 | -1.0993281821 |

B1LYP-40/6-31G(d) NEUTRAL; PCM(DCM) (Gaussian 09)

|   |          |          |          |
|---|----------|----------|----------|
| C | 1.53233  | -1.17513 | -0.04362 |
| C | -0.67354 | 0.00489  | 0.00171  |
| C | -0.50771 | -2.41744 | -0.07179 |
| C | 0.90651  | -2.39262 | -0.07719 |
| C | 0.72515  | -0.01396 | -0.00525 |
| C | -1.30849 | -1.28912 | -0.03450 |
| C | 1.56364  | 1.12506  | 0.02500  |
| C | 0.97122  | 2.35898  | 0.06458  |
| C | -0.44178 | 2.42188  | 0.07324  |
| C | -1.27297 | 1.31553  | 0.04406  |
| C | 2.92649  | -0.72042 | -0.03630 |
| C | 2.94492  | 0.63297  | 0.00404  |

|   |          |          |          |
|---|----------|----------|----------|
| H | 3.78680  | -1.37053 | -0.05954 |
| H | 3.82262  | 1.25967  | 0.01878  |
| H | -0.99437 | -3.38262 | -0.09861 |
| H | -0.90201 | 3.39979  | 0.10478  |
| H | 1.45591  | -3.32378 | -0.10736 |
| H | 1.54575  | 3.27501  | 0.08912  |
| C | -2.80215 | -1.49442 | -0.03508 |
| H | -3.28048 | -1.03125 | -0.89758 |
| H | -3.27466 | -1.08138 | 0.85555  |
| H | -3.03182 | -2.55757 | -0.06474 |
| C | -2.76046 | 1.56104  | 0.05941  |
| H | -2.96103 | 2.63000  | 0.09128  |
| H | -3.24254 | 1.11076  | 0.92663  |
| H | -3.25269 | 1.16108  | -0.82650 |

B1LYP-40/6-31G(d) Cation Radical A2-SYM; PCM(DCM) (Gaussian 09)

|   |          |          |          |
|---|----------|----------|----------|
| C | 1.51962  | -1.16420 | -0.04103 |
| C | -0.68485 | 0.00481  | 0.00102  |
| C | -0.49570 | -2.43208 | -0.07076 |
| C | 0.89221  | -2.40665 | -0.07345 |
| C | 0.71766  | -0.01399 | -0.00564 |
| C | -1.31988 | -1.27557 | -0.03597 |
| C | 1.55050  | 1.11430  | 0.02235  |
| C | 0.95688  | 2.37308  | 0.05964  |
| C | -0.42973 | 2.43573  | 0.07038  |
| C | -1.28489 | 1.30180  | 0.04434  |
| C | 2.93614  | -0.71471 | -0.03373 |
| C | 2.95439  | 0.62702  | 0.00316  |
| H | 3.78541  | -1.37625 | -0.05504 |
| H | 3.82127  | 1.26547  | 0.01727  |
| H | -0.99120 | -3.39062 | -0.09700 |
| H | -0.89910 | 3.40718  | 0.10113  |
| H | 1.45150  | -3.32945 | -0.10055 |
| H | 1.54058  | 3.28078  | 0.08068  |
| C | -2.79803 | -1.49120 | -0.04515 |
| H | -3.26159 | -1.02179 | -0.91376 |
| H | -3.26972 | -1.06132 | 0.83882  |
| H | -3.03135 | -2.55127 | -0.07053 |
| C | -2.75643 | 1.55775  | 0.06939  |
| H | -2.96002 | 2.62390  | 0.09711  |
| H | -3.22306 | 1.10135  | 0.94323  |
| H | -3.24955 | 1.14115  | -0.80914 |

B1LYP-40/6-31G(d) Cation Radical B2-SYM; PCM(DCM) (Gaussian 09)

|   |          |          |          |
|---|----------|----------|----------|
| C | 1.53249  | -1.19055 | -0.04120 |
| C | -0.67466 | 0.00479  | 0.00127  |
| C | -0.49557 | -2.43716 | -0.06973 |
| C | 0.89964  | -2.42317 | -0.07211 |
| C | 0.71960  | -0.01394 | -0.00563 |
| C | -1.30062 | -1.29133 | -0.03650 |

|   |          |          |          |
|---|----------|----------|----------|
| C | 1.56424  | 1.14046  | 0.02217  |
| C | 0.96501  | 2.38967  | 0.05892  |
| C | -0.42919 | 2.44111  | 0.07040  |
| C | -1.26505 | 1.31728  | 0.04546  |
| C | 2.87324  | -0.75476 | -0.03480 |
| C | 2.89262  | 0.66880  | 0.00385  |
| H | 3.74879  | -1.38269 | -0.05500 |
| H | 3.78496  | 1.27279  | 0.01640  |
| H | -0.99326 | -3.39434 | -0.09608 |
| H | -0.90082 | 3.41123  | 0.10178  |
| H | 1.45472  | -3.34868 | -0.09822 |
| H | 1.54490  | 3.30003  | 0.07936  |
| C | -2.78634 | -1.49870 | -0.04797 |
| H | -3.24582 | -1.03482 | -0.91993 |
| H | -3.25794 | -1.07129 | 0.83549  |
| H | -3.01999 | -2.55913 | -0.07203 |
| C | -2.74439 | 1.56496  | 0.07278  |
| H | -2.94866 | 2.63141  | 0.09877  |
| H | -3.20670 | 1.11409  | 0.95002  |
| H | -3.23719 | 1.15031  | -0.80512 |

## 5 (Scheme 1)

B1LYP-40/6-31G(d) NEUTRAL; gas (Molpro)

|   |               |               |               |
|---|---------------|---------------|---------------|
| C | 0.6842871460  | 0.0000000000  | 4.6549017350  |
| C | 0.7025548659  | 0.0000000000  | 2.2617706053  |
| C | -1.4523561541 | 0.0000000000  | 3.4330687079  |
| C | -0.6842871460 | 0.0000000000  | 4.6549017350  |
| C | 1.4523561541  | 0.0000000000  | 3.4330687079  |
| H | 1.2101684391  | 0.0000000000  | 5.6003704506  |
| C | -0.7025548659 | 0.0000000000  | 2.2617706053  |
| C | 2.8507661272  | 0.0000000000  | 3.2483985347  |
| C | 3.3725752895  | 0.0000000000  | 1.9648711675  |
| C | 2.5658081337  | 0.0000000000  | 0.8014376372  |
| H | 3.5181346690  | 0.0000000000  | 4.0996380579  |
| H | 4.4468663327  | 0.0000000000  | 1.8420586104  |
| C | 1.1980139547  | 0.0000000000  | 0.9541742679  |
| H | 3.0373388689  | 0.0000000000  | -0.1718522150 |
| H | -1.2101684391 | 0.0000000000  | 5.6003704506  |
| C | -1.1980139547 | 0.0000000000  | 0.9541742679  |
| C | -2.5658081337 | 0.0000000000  | 0.8014376372  |
| C | -3.3725752895 | 0.0000000000  | 1.9648711675  |
| C | -2.8507661272 | 0.0000000000  | 3.2483985347  |
| H | -4.4468663327 | 0.0000000000  | 1.8420586104  |
| H | -3.5181346690 | 0.0000000000  | 4.0996380579  |
| H | -3.0373388689 | 0.0000000000  | -0.1718522150 |
| C | 0.0000000000  | 0.0000000000  | 0.0008396814  |
| H | 0.0000000000  | -0.8758488150 | -0.6516474000 |
| H | 0.0000000000  | 0.8758488150  | -0.6516474000 |

B1LYP-40/6-31G(d) Cation Radical A2-SYM; gas (Molpro)

|   |               |               |               |
|---|---------------|---------------|---------------|
| C | 0.6798436970  | 0.0000000000  | 4.6883320316  |
| C | 0.6865999787  | 0.0000000000  | 2.2610638017  |
| C | -1.4435488708 | 0.0000000000  | 3.4530582045  |
| C | -0.6798436970 | 0.0000000000  | 4.6883320316  |
| C | 1.4435488708  | 0.0000000000  | 3.4530582045  |
| H | 1.2149075008  | 0.0000000000  | 5.6265561958  |
| C | -0.6865999787 | 0.0000000000  | 2.2610638017  |
| C | 2.8169858969  | 0.0000000000  | 3.2665559087  |
| C | 3.3428099422  | 0.0000000000  | 1.9542749253  |
| C | 2.5534048232  | 0.0000000000  | 0.7795355983  |
| H | 3.4983794616  | 0.0000000000  | 4.1046455619  |
| H | 4.4177328935  | 0.0000000000  | 1.8436410698  |
| C | 1.1902956844  | 0.0000000000  | 0.9312713495  |
| H | 3.0346980003  | 0.0000000000  | -0.1866813121 |
| H | -1.2149075008 | 0.0000000000  | 5.6265561958  |
| C | -1.1902956844 | 0.0000000000  | 0.9312713495  |
| C | -2.5534048232 | 0.0000000000  | 0.7795355983  |
| C | -3.3428099422 | 0.0000000000  | 1.9542749253  |
| C | -2.8169858969 | 0.0000000000  | 3.2665559087  |
| H | -4.4177328935 | 0.0000000000  | 1.8436410698  |
| H | -3.4983794616 | 0.0000000000  | 4.1046455619  |
| H | -3.0346980003 | 0.0000000000  | -0.1866813121 |
| C | 0.0000000000  | 0.0000000000  | -0.0228410977 |
| H | 0.0000000000  | -0.8763115583 | -0.6732227862 |
| H | 0.0000000000  | 0.8763115583  | -0.6732227862 |

B1LYP-40/6-31G(d) Cation Radical B2-SYM; gas (Molpro)

|   |               |              |               |
|---|---------------|--------------|---------------|
| C | 0.7095509515  | 0.0000000000 | 4.6258296079  |
| C | 0.7029146819  | 0.0000000000 | 2.2546069666  |
| C | -1.4586866428 | 0.0000000000 | 3.4338816632  |
| C | -0.7095509515 | 0.0000000000 | 4.6258296079  |
| C | 1.4586866428  | 0.0000000000 | 3.4338816632  |
| H | 1.2159630948  | 0.0000000000 | 5.5808918965  |
| C | -0.7029146819 | 0.0000000000 | 2.2546069666  |
| C | 2.8744483681  | 0.0000000000 | 3.2539752221  |
| C | 3.3925951378  | 0.0000000000 | 1.9705620618  |
| C | 2.5775720828  | 0.0000000000 | 0.8138710311  |
| H | 3.5371565342  | 0.0000000000 | 4.1070313435  |
| H | 4.4641197893  | 0.0000000000 | 1.8403132482  |
| C | 1.1894736555  | 0.0000000000 | 0.9599517192  |
| H | 3.0458407820  | 0.0000000000 | -0.1600646751 |
| H | -1.2159630948 | 0.0000000000 | 5.5808918965  |
| C | -1.1894736555 | 0.0000000000 | 0.9599517192  |
| C | -2.5775720828 | 0.0000000000 | 0.8138710311  |
| C | -3.3925951378 | 0.0000000000 | 1.9705620618  |
| C | -2.8744483681 | 0.0000000000 | 3.2539752221  |
| H | -4.4641197893 | 0.0000000000 | 1.8403132482  |
| H | -3.5371565342 | 0.0000000000 | 4.1070313435  |
| H | -3.0458407820 | 0.0000000000 | -0.1600646751 |
| C | 0.0000000000  | 0.0000000000 | 0.0070977622  |

|   |              |               |               |
|---|--------------|---------------|---------------|
| H | 0.0000000000 | -0.8754029199 | -0.6467889660 |
| H | 0.0000000000 | 0.8754029199  | -0.6467889660 |

B1LYP-40/6-31G(d) NEUTRAL; PCM(DCM) (Gaussian 09)

|   |          |          |          |
|---|----------|----------|----------|
| C | 0.68451  | 2.36346  | -0.00008 |
| C | 0.70264  | -0.03094 | -0.00006 |
| C | -1.45254 | 1.14079  | -0.00007 |
| C | -0.68451 | 2.36346  | -0.00008 |
| C | 1.45254  | 1.14079  | -0.00007 |
| H | 1.21054  | 3.30872  | -0.00009 |
| C | -0.70264 | -0.03094 | -0.00006 |
| C | 2.85155  | 0.95661  | -0.00007 |
| C | 3.37263  | -0.32791 | -0.00007 |
| C | 2.56567  | -1.49188 | -0.00006 |
| H | 3.51888  | 1.80777  | -0.00008 |
| H | 4.44681  | -0.45126 | -0.00007 |
| C | 1.19745  | -1.33928 | -0.00005 |
| H | 3.03700  | -2.46507 | -0.00006 |
| H | -1.21054 | 3.30872  | -0.00009 |
| C | -1.19745 | -1.33928 | -0.00005 |
| C | -2.56567 | -1.49188 | -0.00006 |
| C | -3.37263 | -0.32791 | -0.00007 |
| C | -2.85155 | 0.95661  | -0.00007 |
| H | -4.44681 | -0.45126 | -0.00007 |
| H | -3.51888 | 1.80777  | -0.00008 |
| H | -3.03700 | -2.46507 | -0.00006 |
| C | 0.00000  | -2.29269 | -0.00004 |
| H | 0.00000  | -2.94567 | 0.87494  |
| H | 0.00000  | -2.94569 | -0.87500 |

B1LYP-40/6-31G(d) Cation Radical A2-SYM; PCM(DCM) (Gaussian 09)

This structure is a transition state.

|   |          |          |          |
|---|----------|----------|----------|
| C | 0.67963  | 2.39456  | -0.00008 |
| C | 0.68631  | -0.03120 | -0.00006 |
| C | -1.44328 | 1.15982  | -0.00007 |
| C | -0.67963 | 2.39456  | -0.00008 |
| C | 1.44328  | 1.15982  | -0.00007 |
| H | 1.21593  | 3.33161  | -0.00009 |
| C | -0.68631 | -0.03120 | -0.00006 |
| C | 2.81577  | 0.97371  | -0.00007 |
| C | 3.34068  | -0.33894 | -0.00006 |
| C | 2.55204  | -1.51229 | -0.00005 |
| H | 3.49659  | 1.81180  | -0.00008 |
| H | 4.41504  | -0.44956 | -0.00006 |
| C | 1.18889  | -1.36062 | -0.00006 |
| H | 3.03174  | -2.47880 | -0.00005 |
| H | -1.21593 | 3.33161  | -0.00009 |
| C | -1.18889 | -1.36062 | -0.00006 |
| C | -2.55204 | -1.51229 | -0.00005 |
| C | -3.34068 | -0.33894 | -0.00006 |

|   |          |          |          |
|---|----------|----------|----------|
| C | -2.81577 | 0.97371  | -0.00007 |
| H | -4.41504 | -0.44956 | -0.00006 |
| H | -3.49659 | 1.81180  | -0.00008 |
| H | -3.03174 | -2.47880 | -0.00005 |
| C | 0.00000  | -2.31345 | -0.00005 |
| H | 0.00000  | -2.96265 | 0.87618  |
| H | 0.00000  | -2.96266 | -0.87626 |

B1LYP-40/6-31G(d) Cation Radical B2-SYM; PCM(DCM) (Gaussian 09)

|   |          |          |          |
|---|----------|----------|----------|
| C | 0.70946  | 2.33205  | -0.00004 |
| C | 0.70268  | -0.03864 | -0.00005 |
| C | -1.45761 | 1.14010  | -0.00005 |
| C | -0.70946 | 2.33205  | -0.00004 |
| C | 1.45761  | 1.14010  | -0.00005 |
| H | 1.21609  | 3.28603  | -0.00004 |
| C | -0.70268 | -0.03864 | -0.00005 |
| C | 2.87240  | 0.96093  | -0.00007 |
| C | 3.38975  | -0.32255 | -0.00009 |
| C | 2.57525  | -1.47942 | -0.00010 |
| H | 3.53289  | 1.81523  | -0.00006 |
| H | 4.46101  | -0.45320 | -0.00011 |
| C | 1.18826  | -1.33332 | -0.00008 |
| H | 3.04197  | -2.45358 | -0.00013 |
| H | -1.21609 | 3.28603  | -0.00004 |
| C | -1.18826 | -1.33332 | -0.00008 |
| C | -2.57525 | -1.47942 | -0.00010 |
| C | -3.38975 | -0.32255 | -0.00009 |
| C | -2.87240 | 0.96093  | -0.00007 |
| H | -4.46101 | -0.45320 | -0.00011 |
| H | -3.53289 | 1.81523  | -0.00006 |
| H | -3.04197 | -2.45358 | -0.00013 |
| C | 0.00000  | -2.28523 | -0.00009 |
| H | 0.00000  | -2.93824 | 0.87505  |
| H | 0.00000  | -2.93827 | -0.87519 |

## 6 (Scheme 1)

B1LYP-40/6-31G(d) NEUTRAL; gas (Molpro)

|   |               |              |               |
|---|---------------|--------------|---------------|
| C | -1.2412389232 | 0.0000000000 | -1.3896950027 |
| C | 0.0000000000  | 0.0000000000 | 0.7085794251  |
| C | -2.4294592005 | 0.0000000000 | 0.7110522389  |
| C | -2.4294592005 | 0.0000000000 | -0.7110522389 |
| C | 0.0000000000  | 0.0000000000 | -0.7085794251 |
| H | -1.2474052594 | 0.0000000000 | -2.4731114342 |
| C | -1.2412389232 | 0.0000000000 | 1.3896950027  |
| H | -1.2474052594 | 0.0000000000 | 2.4731114342  |
| C | 1.2412389232  | 0.0000000000 | -1.3896950027 |
| C | 2.4294592005  | 0.0000000000 | -0.7110522389 |
| C | 2.4294592005  | 0.0000000000 | 0.7110522389  |
| H | 1.2474052594  | 0.0000000000 | -2.4731114342 |
| C | 1.2412389232  | 0.0000000000 | 1.3896950027  |

|   |               |              |               |
|---|---------------|--------------|---------------|
| H | 1.2474052594  | 0.0000000000 | 2.4731114342  |
| O | -3.6470674099 | 0.0000000000 | -1.3110140851 |
| O | -3.6470674099 | 0.0000000000 | 1.3110140851  |
| O | 3.6470674099  | 0.0000000000 | 1.3110140851  |
| H | -3.5235517503 | 0.0000000000 | 2.2647897134  |
| H | -3.5235517503 | 0.0000000000 | -2.2647897134 |
| O | 3.6470674099  | 0.0000000000 | -1.3110140851 |
| H | 3.5235517503  | 0.0000000000 | -2.2647897134 |
| H | 3.5235517503  | 0.0000000000 | 2.2647897134  |

B1LYP-40/6-31G(d) Cation Radical Au-SYM; gas (Molpro)

|   |               |              |               |
|---|---------------|--------------|---------------|
| C | -1.2326553968 | 0.0000000000 | -1.3891309842 |
| C | 0.0000000000  | 0.0000000000 | 0.7074685450  |
| C | -2.4497584291 | 0.0000000000 | 0.7046882397  |
| C | -2.4497584291 | 0.0000000000 | -0.7046882397 |
| C | 0.0000000000  | 0.0000000000 | -0.7074685450 |
| H | -1.2417886549 | 0.0000000000 | -2.4711387929 |
| C | -1.2326553968 | 0.0000000000 | 1.3891309842  |
| H | -1.2417886549 | 0.0000000000 | 2.4711387929  |
| C | 1.2326553968  | 0.0000000000 | -1.3891309842 |
| C | 2.4497584291  | 0.0000000000 | -0.7046882397 |
| C | 2.4497584291  | 0.0000000000 | 0.7046882397  |
| H | 1.2417886549  | 0.0000000000 | -2.4711387929 |
| C | 1.2326553968  | 0.0000000000 | 1.3891309842  |
| H | 1.2417886549  | 0.0000000000 | 2.4711387929  |
| O | -3.6408880847 | 0.0000000000 | -1.2985344140 |
| O | -3.6408880847 | 0.0000000000 | 1.2985344140  |
| O | 3.6408880847  | 0.0000000000 | 1.2985344140  |
| H | -3.5663313419 | 0.0000000000 | 2.2596665721  |
| H | -3.5663313419 | 0.0000000000 | -2.2596665721 |
| O | 3.6408880847  | 0.0000000000 | -1.2985344140 |
| H | 3.5663313419  | 0.0000000000 | -2.2596665721 |
| H | 3.5663313419  | 0.0000000000 | 2.2596665721  |

B1LYP-40/6-31G(d) Cation Radical B2u-SYM; gas (Molpro)

|   |               |              |               |
|---|---------------|--------------|---------------|
| C | -1.2272248432 | 0.0000000000 | -1.4159339354 |
| C | 0.0000000000  | 0.0000000000 | 0.7304874484  |
| C | -2.4154504940 | 0.0000000000 | 0.7295458965  |
| C | -2.4154504940 | 0.0000000000 | -0.7295458965 |
| C | 0.0000000000  | 0.0000000000 | -0.7304874484 |
| H | -1.2324177086 | 0.0000000000 | -2.4967894952 |
| C | -1.2272248432 | 0.0000000000 | 1.4159339354  |
| H | -1.2324177086 | 0.0000000000 | 2.4967894952  |
| C | 1.2272248432  | 0.0000000000 | -1.4159339354 |
| C | 2.4154504940  | 0.0000000000 | -0.7295458965 |
| C | 2.4154504940  | 0.0000000000 | 0.7295458965  |
| H | 1.2324177086  | 0.0000000000 | -2.4967894952 |
| C | 1.2272248432  | 0.0000000000 | 1.4159339354  |
| H | 1.2324177086  | 0.0000000000 | 2.4967894952  |
| O | -3.6170435466 | 0.0000000000 | -1.2787352287 |

|   |               |              |               |
|---|---------------|--------------|---------------|
| O | -3.6170435466 | 0.0000000000 | 1.2787352287  |
| O | 3.6170435466  | 0.0000000000 | 1.2787352287  |
| H | -3.5703236022 | 0.0000000000 | 2.2434518780  |
| H | -3.5703236022 | 0.0000000000 | -2.2434518780 |
| O | 3.6170435466  | 0.0000000000 | -1.2787352287 |
| H | 3.5703236022  | 0.0000000000 | -2.2434518780 |
| H | 3.5703236022  | 0.0000000000 | 2.2434518780  |

B1LYP-40/6-31G(d) NEUTRAL; PCM(DCM) (Gaussian 09)

|   |          |          |          |
|---|----------|----------|----------|
| C | 1.24055  | -1.39272 | 0.00002  |
| C | 0.00000  | 0.70908  | -0.00000 |
| C | 2.42716  | 0.71115  | -0.00000 |
| C | 2.42716  | -0.71115 | 0.00003  |
| C | 0.00000  | -0.70908 | -0.00001 |
| H | 1.24778  | -2.47528 | 0.00003  |
| C | 1.24055  | 1.39272  | -0.00001 |
| H | 1.24778  | 2.47527  | -0.00003 |
| C | -1.24055 | -1.39272 | -0.00005 |
| C | -2.42716 | -0.71115 | -0.00006 |
| C | -2.42716 | 0.71115  | -0.00000 |
| H | -1.24778 | -2.47527 | -0.00008 |
| C | -1.24055 | 1.39272  | 0.00001  |
| H | -1.24777 | 2.47528  | 0.00004  |
| O | 3.64760  | -1.30985 | 0.00008  |
| O | 3.64760  | 1.30985  | -0.00003 |
| O | -3.64759 | 1.30985  | 0.00004  |
| H | 3.52996  | 2.26566  | 0.00002  |
| H | 3.52996  | -2.26566 | 0.00003  |
| O | -3.64760 | -1.30985 | -0.00011 |
| H | -3.52996 | -2.26566 | -0.00009 |
| H | -3.52996 | 2.26566  | -0.00001 |

B1LYP-40/6-31G(d) Cation Radical B2u-SYM; PCM(DCM) (Gaussian 09)

|   |          |          |          |
|---|----------|----------|----------|
| C | 1.22607  | -1.41687 | -0.00001 |
| C | -0.00002 | 0.73032  | -0.00000 |
| C | 2.41154  | 0.72860  | 0.00002  |
| C | 2.41161  | -0.72886 | 0.00001  |
| C | 0.00002  | -0.73032 | -0.00001 |
| H | 1.23222  | -2.49687 | -0.00001 |
| C | 1.22589  | 1.41675  | 0.00001  |
| H | 1.23219  | 2.49675  | 0.00002  |
| C | -1.22589 | -1.41675 | -0.00003 |
| C | -2.41155 | -0.72860 | -0.00004 |
| C | -2.41162 | 0.72886  | -0.00003 |
| H | -1.23219 | -2.49675 | -0.00004 |
| C | -1.22607 | 1.41687  | -0.00001 |
| H | -1.23223 | 2.49687  | -0.00001 |
| O | 3.61437  | -1.28422 | 0.00002  |
| O | 3.61414  | 1.28411  | 0.00003  |
| O | -3.61438 | 1.28422  | -0.00003 |



|   |          |          |          |
|---|----------|----------|----------|
| H | 3.55207  | 2.24865  | 0.00004  |
| H | 3.55236  | -2.24875 | 0.00001  |
| O | -3.61415 | -1.28411 | -0.00005 |
| H | -3.55207 | -2.24865 | -0.00005 |
| H | -3.55237 | 2.24875  | -0.00003 |

## 7 (Scheme 1)

B1LYP-40/6-31G(d) NEUTRAL; gas (Molpro)

|   |               |              |               |
|---|---------------|--------------|---------------|
| C | 1.2370752951  | 0.0000000000 | -0.6926219845 |
| C | 0.0000000000  | 0.0000000000 | 1.4162128533  |
| C | 2.4253496571  | 0.0000000000 | 1.4130942366  |
| C | 2.4362927920  | 0.0000000000 | -0.0093845955 |
| C | 0.0000000000  | 0.0000000000 | -0.0089883957 |
| H | 1.2370273332  | 0.0000000000 | -1.7754537391 |
| C | 1.2410532139  | 0.0000000000 | 2.0928972250  |
| H | 1.2438919762  | 0.0000000000 | 3.1752945097  |
| C | -1.2370752951 | 0.0000000000 | -0.6926219845 |
| C | -2.4362927920 | 0.0000000000 | -0.0093845955 |
| C | -2.4253496571 | 0.0000000000 | 1.4130942366  |
| H | -1.2370273332 | 0.0000000000 | -1.7754537391 |
| C | -1.2410532139 | 0.0000000000 | 2.0928972250  |
| H | -1.2438919762 | 0.0000000000 | 3.1752945097  |
| N | 3.6429269769  | 0.0000000000 | -0.6669739433 |
| H | 4.5057677705  | 0.0000000000 | -0.1621413758 |
| H | 3.6855895759  | 0.0000000000 | -1.6661490377 |
| N | -3.6429269769 | 0.0000000000 | -0.6669739433 |
| H | -3.6855895759 | 0.0000000000 | -1.6661490377 |
| H | -4.5057677705 | 0.0000000000 | -0.1621413758 |
| H | 3.3657686911  | 0.0000000000 | 1.9480464759  |
| H | -3.3657686911 | 0.0000000000 | 1.9480464759  |

B1LYP-40/6-31G(d) Cation Radical A2-SYM; gas (Molpro)

|   |               |              |               |
|---|---------------|--------------|---------------|
| C | 1.2229815423  | 0.0000000000 | -0.6922529224 |
| C | 0.0000000000  | 0.0000000000 | 1.4242127051  |
| C | 2.4383976930  | 0.0000000000 | 1.4205193388  |
| C | 2.4604101198  | 0.0000000000 | 0.0124239064  |
| C | 0.0000000000  | 0.0000000000 | 0.0003170317  |
| H | 1.2293398346  | 0.0000000000 | -1.7734692909 |
| C | 1.2379486001  | 0.0000000000 | 2.0941045504  |
| H | 1.2448051698  | 0.0000000000 | 3.1752384714  |
| C | -1.2229815423 | 0.0000000000 | -0.6922529224 |
| C | -2.4604101198 | 0.0000000000 | 0.0124239064  |
| C | -2.4383976930 | 0.0000000000 | 1.4205193388  |
| H | -1.2293398346 | 0.0000000000 | -1.7734692909 |
| C | -1.2379486001 | 0.0000000000 | 2.0941045504  |
| H | -1.2448051698 | 0.0000000000 | 3.1752384714  |
| N | 3.6138011379  | 0.0000000000 | -0.6745593577 |
| H | 4.5006843725  | 0.0000000000 | -0.2025496457 |
| H | 3.6319191968  | 0.0000000000 | -1.6784672667 |

|   |               |              |               |
|---|---------------|--------------|---------------|
| N | -3.6138011379 | 0.0000000000 | -0.6745593577 |
| H | -3.6319191968 | 0.0000000000 | -1.6784672667 |
| H | -4.5006843725 | 0.0000000000 | -0.2025496457 |
| H | 3.3697392901  | 0.0000000000 | 1.9669673480  |
| H | -3.3697392901 | 0.0000000000 | 1.9669673480  |

B1LYP-40/6-31G(d) Cation Radical B2-SYM; gas (Molpro)

|   |               |              |               |
|---|---------------|--------------|---------------|
| C | 1.2274968074  | 0.0000000000 | -0.7296443789 |
| C | 0.0000000000  | 0.0000000000 | 1.4034435039  |
| C | 2.4126782824  | 0.0000000000 | 1.4226130609  |
| C | 2.4239378493  | 0.0000000000 | -0.0283066986 |
| C | 0.0000000000  | 0.0000000000 | -0.0561508529 |
| H | 1.2394369151  | 0.0000000000 | -1.8099153265 |
| C | 1.2353144116  | 0.0000000000 | 2.0999628866  |
| H | 1.2289850226  | 0.0000000000 | 3.1799355864  |
| C | -1.2274968074 | 0.0000000000 | -0.7296443789 |
| C | -2.4239378493 | 0.0000000000 | -0.0283066986 |
| C | -2.4126782824 | 0.0000000000 | 1.4226130609  |
| H | -1.2394369151 | 0.0000000000 | -1.8099153265 |
| C | -1.2353144116 | 0.0000000000 | 2.0999628866  |
| H | -1.2289850226 | 0.0000000000 | 3.1799355864  |
| N | 3.6181461246  | 0.0000000000 | -0.6393926327 |
| H | 4.4771633152  | 0.0000000000 | -0.1185662649 |
| H | 3.6926001461  | 0.0000000000 | -1.6420042480 |
| N | -3.6181461246 | 0.0000000000 | -0.6393926327 |
| H | -3.6926001461 | 0.0000000000 | -1.6420042480 |
| H | -4.4771633152 | 0.0000000000 | -0.1185662649 |
| H | 3.3547002013  | 0.0000000000 | 1.9518916902  |
| H | -3.3547002013 | 0.0000000000 | 1.9518916902  |

B1LYP-40/6-31G(d) NEUTRAL; PCM(DCM) (Gaussian 09)

|   |          |          |          |
|---|----------|----------|----------|
| C | 1.23816  | -1.11543 | -0.01616 |
| C | 0.00000  | 0.99420  | -0.00812 |
| C | 2.42550  | 0.98855  | -0.00777 |
| C | 2.43586  | -0.43320 | -0.01437 |
| C | 0.00000  | -0.43023 | -0.01743 |
| H | 1.23767  | -2.19808 | -0.01983 |
| C | 1.24225  | 1.67182  | -0.00243 |
| H | 1.24585  | 2.75393  | 0.00607  |
| C | -1.23816 | -1.11543 | -0.01616 |
| C | -2.43586 | -0.43320 | -0.01437 |
| C | -2.42550 | 0.98855  | -0.00777 |
| H | -1.23767 | -2.19808 | -0.01983 |
| C | -1.24225 | 1.67182  | -0.00243 |
| H | -1.24585 | 2.75393  | 0.00607  |
| N | 3.65833  | -1.09912 | -0.08045 |
| H | 4.42504  | -0.60556 | 0.34802  |
| H | 3.62928  | -2.05450 | 0.23812  |
| N | -3.65833 | -1.09912 | -0.08046 |
| H | -3.62928 | -2.05450 | 0.23812  |

|   |          |          |          |
|---|----------|----------|----------|
| H | -4.42504 | -0.60556 | 0.34801  |
| H | 3.36669  | 1.52154  | -0.01072 |
| H | -3.36669 | 1.52154  | -0.01072 |

B1LYP-40/6-31G(d) Cation Radical A2-SYM; PCM(DCM) (Gaussian 09)

|   |          |          |          |
|---|----------|----------|----------|
| C | 1.22155  | -1.11607 | 0.06527  |
| C | -0.00021 | 1.00181  | 0.01761  |
| C | 2.43700  | 0.99880  | 0.01707  |
| C | 2.45839  | -0.41065 | 0.04813  |
| C | -0.00018 | -0.42252 | 0.04992  |
| H | 1.22882  | -2.19660 | 0.08987  |
| C | 1.23762  | 1.67156  | 0.00245  |
| H | 1.24321  | 2.75226  | -0.02180 |
| C | -1.22188 | -1.11613 | 0.06519  |
| C | -2.45875 | -0.41078 | 0.04796  |
| C | -2.43741 | 0.99867  | 0.01691  |
| H | -1.22909 | -2.19666 | 0.08981  |
| C | -1.23806 | 1.67150  | 0.00236  |
| H | -1.24371 | 2.75219  | -0.02188 |
| N | 3.60923  | -1.09581 | 0.06242  |
| H | 4.49606  | -0.62422 | 0.04520  |
| H | 3.62489  | -2.09959 | 0.07927  |
| N | -3.60957 | -1.09598 | 0.06221  |
| H | -3.62519 | -2.09977 | 0.07887  |
| H | -4.49641 | -0.62443 | 0.04480  |
| H | 3.36986  | 1.54204  | 0.00476  |
| H | -3.37030 | 1.54188  | 0.00454  |
